# Supplementary material for: Bi-Symmetric Polyhedral Cages with Maximally Connected Faces and Small Holes
Source: Preprints.org preprint supplement (doi:10.20944/preprints202411.0400.v1), 2024-11-07
Supplement: Supplementary file 2 [file supplementary]

**Pcages with deformation below 10%**

# HAP6

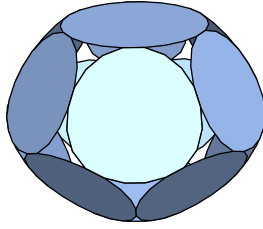

HAP6\_P20\_P24\_5x3-6x3  
 $\Delta_l = 0.0474, \Delta_a = 0.0474$

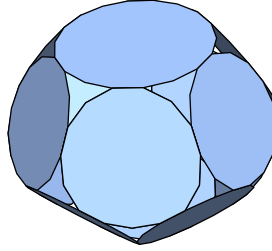

HAP6\_P15\_P18\_5x2-6x2  
 $\Delta_l = 0.0575, \Delta_a = 0.0575$

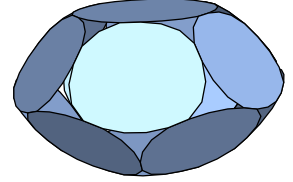

HAP6\_P19\_P24\_3\_2\_3x3-6x3  
 $\Delta_l = 0.0735, \Delta_a = 0.0736$

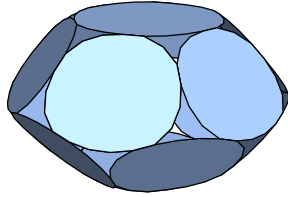

HAP6\_P19\_P24\_2\_4x3-6x3  
 $\Delta_l = 0.0736, \Delta_a = 0.0735$

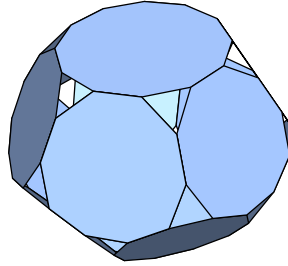

HAP6\_P10\_P12\_5x1-6x1  
 $\Delta_l = 0.0741, \Delta_a = 0.0741$

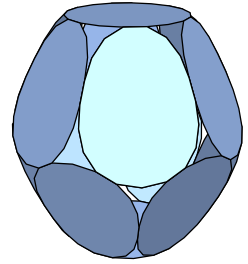

HAP6\_P19\_P18\_3x3\_2\_3-6x2  
 $\Delta_l = 0.0786, \Delta_a = 0.0785$

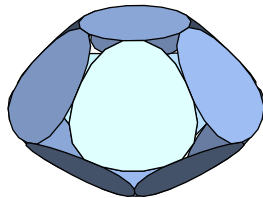

HAP6\_P20\_P18\_5x3-6x2  
 $\Delta_l = 0.0796, \Delta_a = 0.0795$

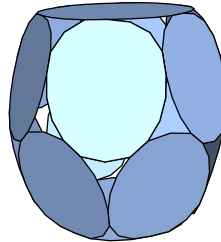

HAP6\_P18\_P24\_3\_2\_3\_2\_3-6x3  
 $\Delta_l = 0.0798, \Delta_a = 0.0798$

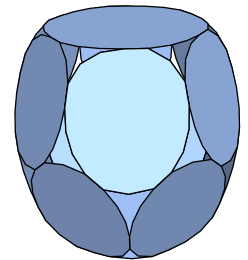

HAP6\_P18\_P24\_2\_2x3\_2\_3-6x3  
 $\Delta_l = 0.0798, \Delta_a = 0.0798$

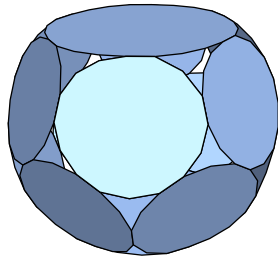

HAP6\_P16\_P24\_2\_3\_3x2-6x3  
 $\Delta_l = 0.0833, \Delta_a = 0.0833$

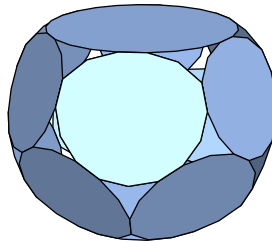

HAP6\_P15\_P24\_5x2-6x3  
 $\Delta_l = 0.0894, \Delta_a = 0.0893$

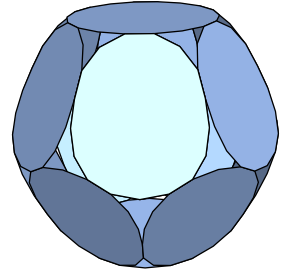

HAP6\_P17\_P18\_2x2\_3\_2\_3-6x2  
 $\Delta_l = 0.0910, \Delta_a = 0.0908$

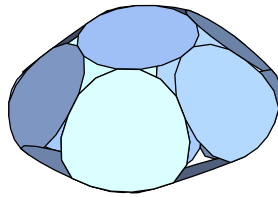

HAP6\_P18\_P18\_2x2\_3x3-6x2  
 $\Delta_l = 0.0989, \Delta_a = 0.0989$

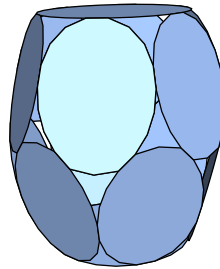

HAP6\_P19\_P24\_3x3\_2\_3-6x3  
 $\Delta_l = 0.0993, \Delta_a = 0.0992$

# IP5

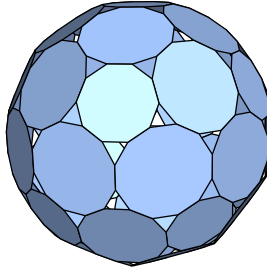

IP5\_P10\_P12\_5x1-6x1  
 $\Delta_l = 0.0161, \Delta_a = 0.0161$

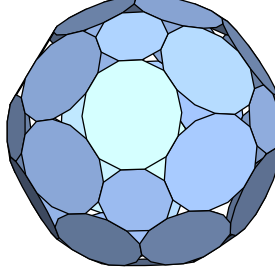

IP5\_P10\_P14\_5x1-2\_2x1\_2\_2x1  
 $\Delta_l = 0.0296, \Delta_a = 0.0295$

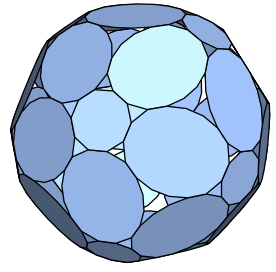

IP5\_P10\_P16\_5x1-3\_2x1\_3\_2x1  
 $\Delta_l = 0.0422, \Delta_a = 0.0414$

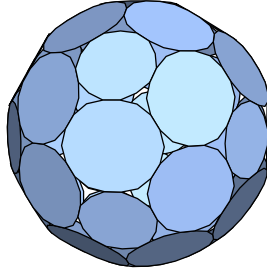

IP5\_P15\_P18\_5x2-6x2  
 $\Delta_l = 0.0526, \Delta_a = 0.0481$

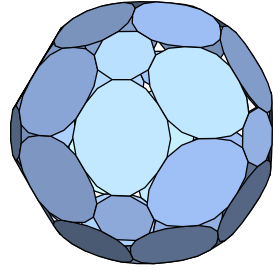

IP5\_P10\_P18\_5x1-6x2  
 $\Delta_l = 0.0767, \Delta_a = 0.0767$

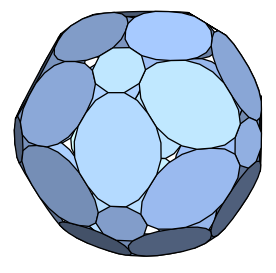

IP5\_P10\_P20\_5x1-3\_2x2\_3\_2x2  
 $\Delta_l = 0.0769, \Delta_a = 0.0769$

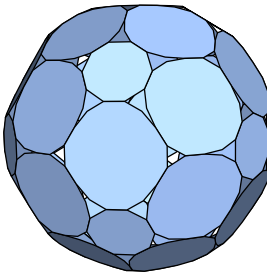

IP5\_P10\_P16\_5x1-1\_2x2\_1\_2x2  
 $\Delta_l = 0.0911, \Delta_a = 0.0910$

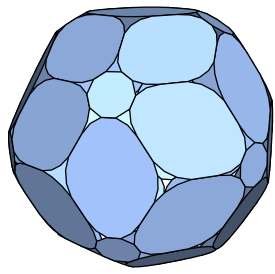

IP5\_P10\_P24\_5x1-6x3  
 $\Delta_l = 0.0911, \Delta_a = 0.0905$

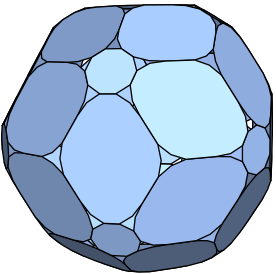

IP5\_P10\_P22\_5x1-2\_2x3\_2\_2x3  
 $\Delta_l = 0.0999, \Delta_a = 0.0081$

# PD

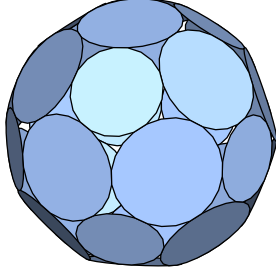

PD\_P20\_P24\_5x3-6x3  
 $\Delta_l = 0.0084, \Delta_a = 0.0084$

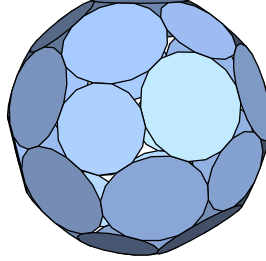

PD\_P15\_P18\_5x2-6x2  
 $\Delta_l = 0.0096, \Delta_a = 0.0096$

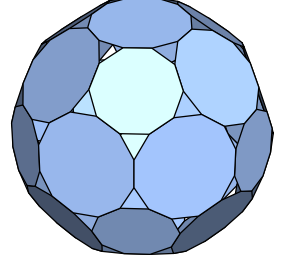

PD\_P10\_P12\_5x1-6x1  
 $\Delta_l = 0.0109, \Delta_a = 0.0109$

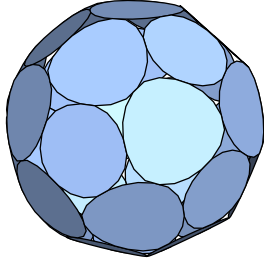

PD\_P20\_P21\_5x3-2\_3\_2\_3\_2\_3  
 $\Delta_l = 0.0699, \Delta_a = 0.0698$

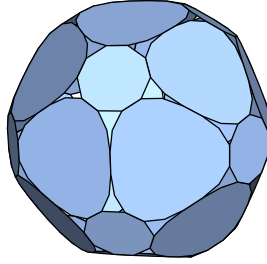

PD\_P10\_P18\_5x1-6x2  
 $\Delta_l = 0.0774, \Delta_a = 0.0774$

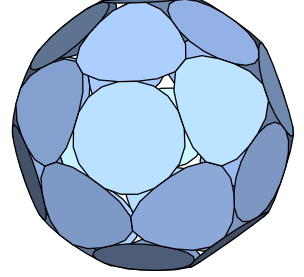

PD\_P20\_P18\_5x3-6x2  
 $\Delta_l = 0.0842, \Delta_a = 0.0841$

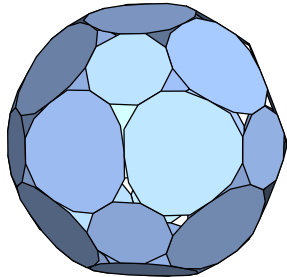

PD\_P10\_P15\_5x1-1\_2\_1\_2\_1\_2  
 $\Delta_l = 0.0956, \Delta_a = 0.0956$

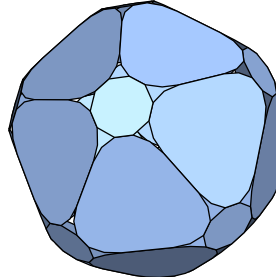

PD\_P10\_P24\_5x1-6x3  
 $\Delta_l = 0.0976, \Delta_a = 0.0975$

# TOP6

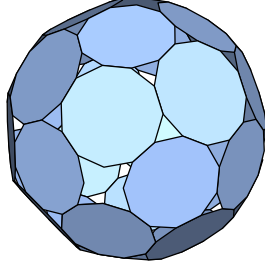

TOP6\_P11\_P12\_2\_4x1-6x1  
 $\Delta_l = 0.0096, \Delta_a = 0.0093$

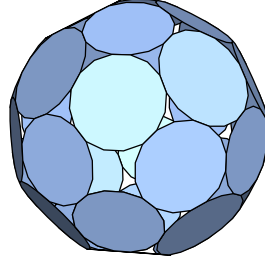

TOP6\_P16\_P18\_3\_4x2-6x2  
 $\Delta_l = 0.0234, \Delta_a = 0.0234$

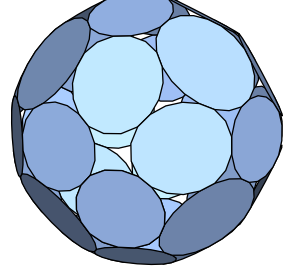

TOP6\_P18\_P21\_2x3\_2x2\_3-2\_3\_2\_3\_2\_3  
 $\Delta_l = 0.0269, \Delta_a = 0.0268$

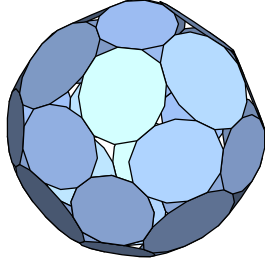

TOP6\_P13\_P15\_2x2\_2x1\_2-1\_2\_1\_2\_1\_2  
 $\Delta_l = 0.0593, \Delta_a = 0.0593$

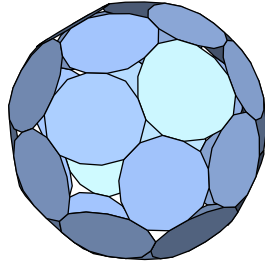

TOP6\_P14\_P15\_3\_1\_2x2\_1-2\_1\_2\_1\_2\_1  
 $\Delta_l = 0.0685, \Delta_a = 0.0461$

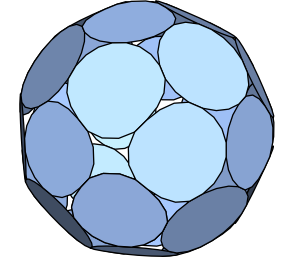

TOP6\_P20\_P21\_5x3-3\_2\_3\_2\_3\_2  
 $\Delta_l = 0.0694, \Delta_a = 0.0692$

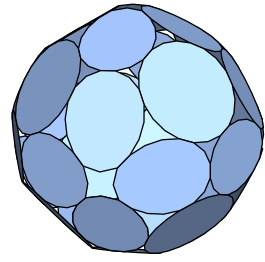

TOP6\_P17\_P21\_2\_3\_2x2\_3-2\_3\_2\_3\_2\_3  
 $\Delta_l = 0.0743, \Delta_a = 0.0742$

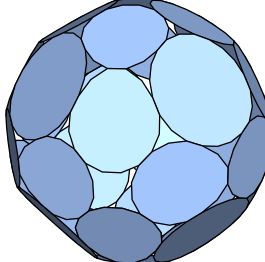

TOP6\_P16\_P21\_3\_4x2-3\_2\_3\_2\_3\_2  
 $\Delta_l = 0.0791, \Delta_a = 0.0790$

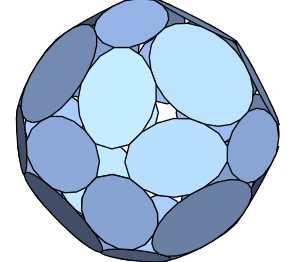

TOP6\_P17\_P24\_2\_3\_2x2\_3-6x3  
 $\Delta_l = 0.0796, \Delta_a = 0.0795$

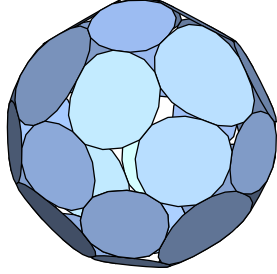

TOP6\_P17\_P21\_3\_3x2\_3-2\_3\_2\_3\_2\_3  
 $\Delta_l = 0.0798, \Delta_a = 0.0687$

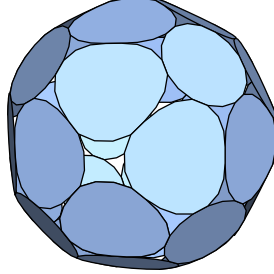

TOP6\_P20\_P18\_5x3-6x2  
 $\Delta_l = 0.0805, \Delta_a = 0.0804$

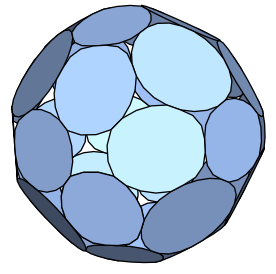

TOP6\_P20\_P24\_5x3-6x3  
 $\Delta_l = 0.0816, \Delta_a = 0.0816$

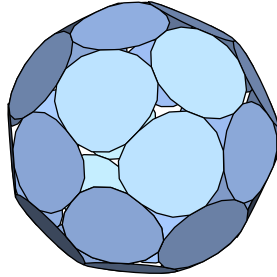

TOP6\_P18\_P18\_2x3\_2x2\_3-6x2  
 $\Delta_l = 0.0823, \Delta_a = 0.0823$

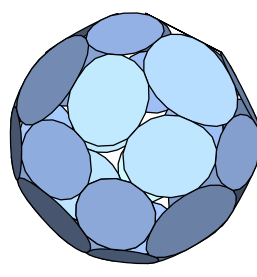

TOP6\_P19\_P24\_2x3\_2\_2x3-6x3  
 $\Delta_l = 0.0850, \Delta_a = 0.0849$

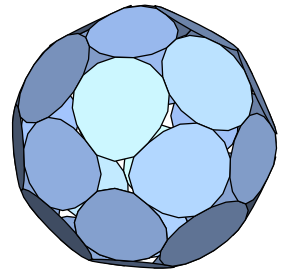

TOP6\_P17\_P18\_2\_3\_2x2\_3-6x2  
 $\Delta_l = 0.0855, \Delta_a = 0.0854$

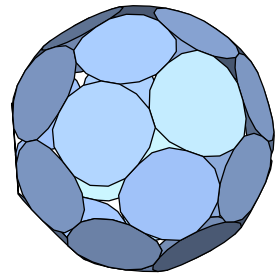

TOP6\_P17\_P18\_3\_3x2\_3-6x2  
 $\Delta_l = 0.0864, \Delta_a = 0.0863$

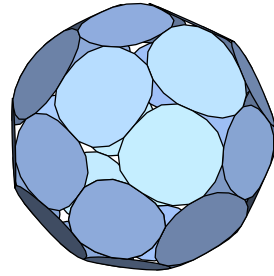

TOP6\_P19\_P21\_2x3\_2\_2x3-3\_2\_3\_2\_3\_2  
 $\Delta_l = 0.0867, \Delta_a = 0.0868$

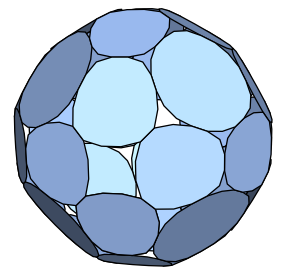

TOP6\_P16\_P21\_3\_4x2-2\_3\_2\_3\_2\_3  
 $\Delta_l = 0.0876, \Delta_a = 0.0875$

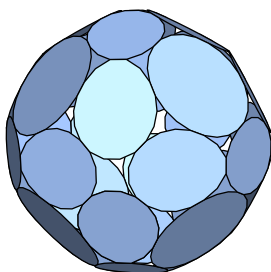

TOP6\_P18\_P24\_2x3\_2x2\_3-6x3  
 $\Delta_l = 0.0891, \Delta_a = 0.0891$

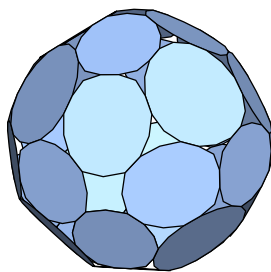

TOP6\_P15\_P18\_5x2-6x2  
 $\Delta_l = 0.0894, \Delta_a = 0.0896$

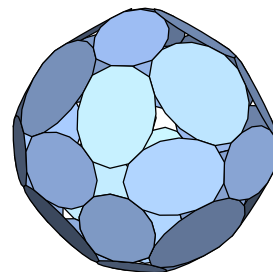

TOP6\_P15\_P18\_2\_3\_2x1\_3-1\_3\_1\_3\_1\_3  
 $\Delta_l = 0.0915, \Delta_a = 0.0914$

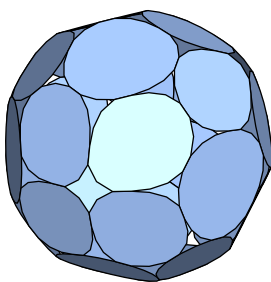

TOP6\_P18\_P21\_2\_3\_2\_2x3-3\_2\_3\_2\_3\_2  
 $\Delta_l = 0.0924, \Delta_a = 0.0922$

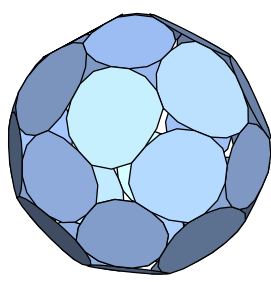

TOP6\_P16\_P18\_4x2\_3-6x2  
 $\Delta_l = 0.0937, \Delta_a = 0.0937$

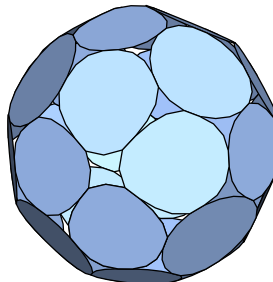

TOP6\_P19\_P21\_2\_4x3-3\_2\_3\_2\_3\_2  
 $\Delta_l = 0.0957, \Delta_a = 0.0957$

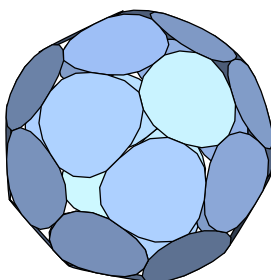

TOP6\_P19\_P18\_2x3\_2\_2x3-6x2  
 $\Delta_l = 0.0981, \Delta_a = 0.0980$

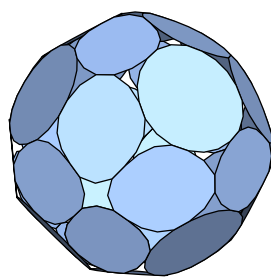

TOP6\_P17\_P21\_2\_3\_2x2\_3-3\_2\_3\_2\_3\_2  
 $\Delta_l = 0.0986, \Delta_a = 0.0986$

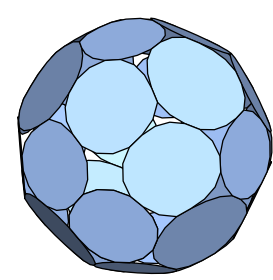

TOP6\_P18\_P21\_3\_2\_3\_2\_3-3\_2\_3\_2\_3\_2  
 $\Delta_l = 0.0998, \Delta_a = 0.0998$



# TTP6

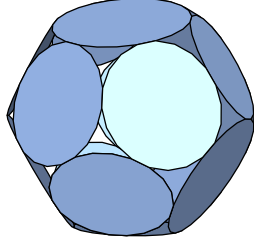

TTP6\_P20\_P24\_5x3-6x3  
 $\Delta_l = 0.0229, \Delta_a = 0.0229$

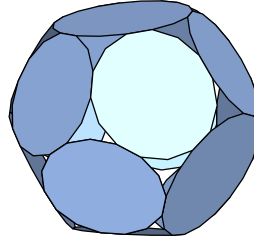

TTP6\_P15\_P18\_5x2-6x2  
 $\Delta_l = 0.0261, \Delta_a = 0.0261$

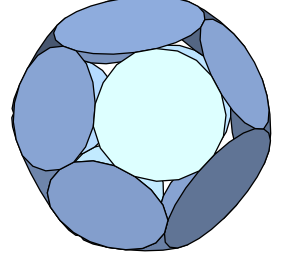

TTP6\_P19\_P24\_2\_4x3-6x3  
 $\Delta_l = 0.0280, \Delta_a = 0.0280$

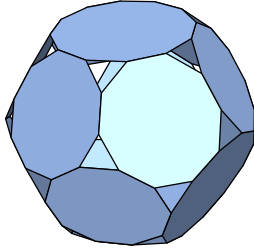

TTP6\_P10\_P12\_5x1-6x1  
 $\Delta_l = 0.0297, \Delta_a = 0.0297$

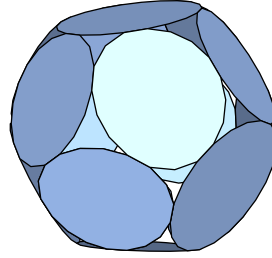

TTP6\_P18\_P21\_3\_2\_2x3\_2-3\_2\_3\_2\_2  
 $\Delta_l = 0.0422, \Delta_a = 0.0421$

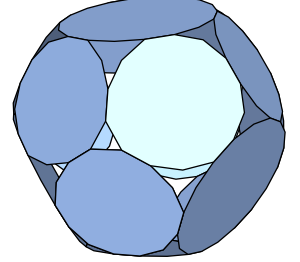

TTP6\_P14\_P18\_1\_4x2-6x2  
 $\Delta_l = 0.0469, \Delta_a = 0.0457$

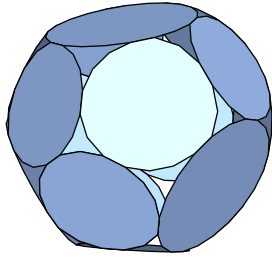

TTP6\_P17\_P21\_2\_3\_2x2\_3-2\_3\_2\_3\_2\_3  
 $\Delta_l = 0.0618, \Delta_a = 0.0618$

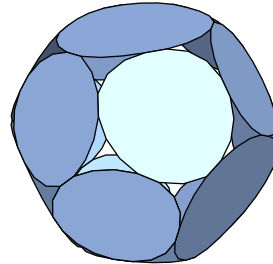

TTP6\_P19\_P24\_3\_2\_3x3-6x3  
 $\Delta_l = 0.0703, \Delta_a = 0.0703$

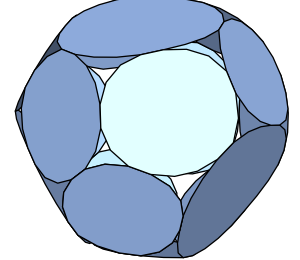

TTP6\_P18\_P24\_2\_3\_2\_2x3-6x3  
 $\Delta_l = 0.0706, \Delta_a = 0.0706$

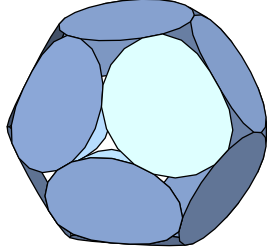

TTP6\_P20\_P21\_5x3-2\_3\_2\_3\_2\_3  
 $\Delta_l = 0.0721, \Delta_a = 0.0720$

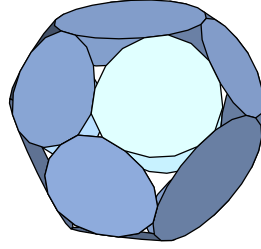

TTP6\_P16\_P21\_1\_3\_2x2\_3-2\_3\_2\_3\_2\_3  
 $\Delta_l = 0.0727, \Delta_a = 0.0045$

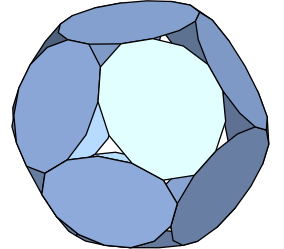

TTP6\_P13\_P15\_2\_1\_2x2\_1-2\_1\_2\_1\_2\_1  
 $\Delta_l = 0.0737, \Delta_a = 0.0734$

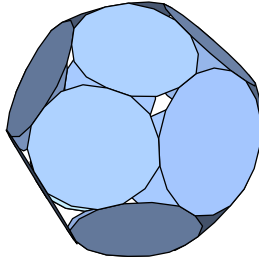

TTP6\_P16\_P18\_3\_4x2-6x2  
 $\Delta_l = 0.0746, \Delta_a = 0.0746$

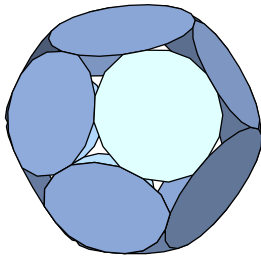

TTP6\_P17\_P21\_2x2\_2x3\_2-3\_2\_3\_2\_3\_2  
 $\Delta_l = 0.0749, \Delta_a = 0.0750$

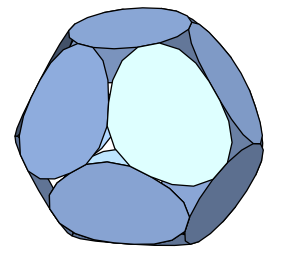

TTP6\_P19\_P18\_2\_4x3-6x2  
 $\Delta_l = 0.0755, \Delta_a = 0.0755$

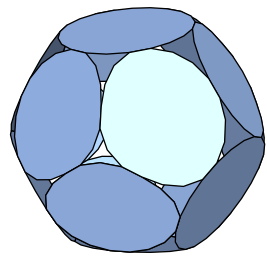

TTP6\_P19\_P21\_2\_4x3-3\_2\_3\_2\_3\_2  
 $\Delta_l = 0.0782, \Delta_a = 0.0781$

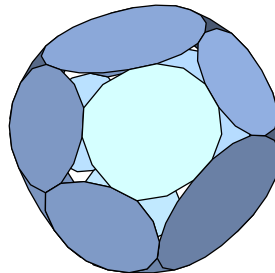

TTP6\_P15\_P21\_5x2-2\_3\_2\_3\_2\_3  
 $\Delta_l = 0.0782, \Delta_a = 0.0783$

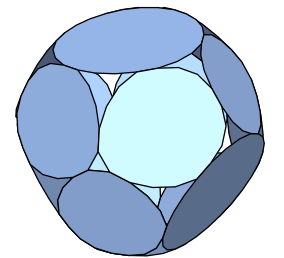

TTP6\_P18\_P24\_1\_4x3-6x3  
 $\Delta_l = 0.0785, \Delta_a = 0.0744$

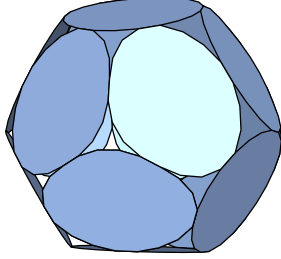

TTP6\_P20\_P21\_5x3-3\_2\_3\_2\_3\_2  
 $\Delta_l = 0.0802, \Delta_a = 0.0801$

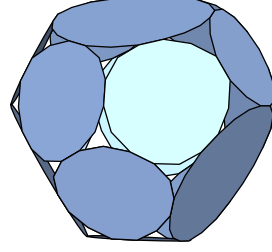

TTP6\_P15\_P21\_5x2-3\_2\_3\_2\_3\_2  
 $\Delta_l = 0.0807, \Delta_a = 0.0808$

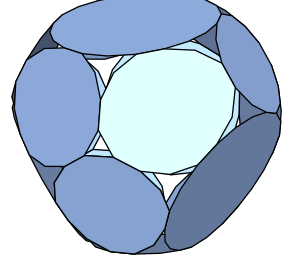

TTP6\_P14\_P21\_1\_4x2-3\_2\_3\_2\_3\_2  
 $\Delta_l = 0.0813, \Delta_a = 0.0812$

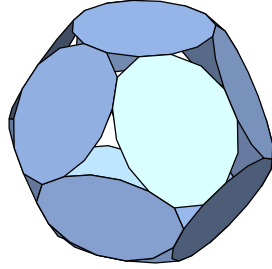

TTP6\_P14\_P15\_3\_1\_2x2\_1-2\_1\_2\_1\_2\_1  
 $\Delta_l = 0.0814, \Delta_a = 0.0811$

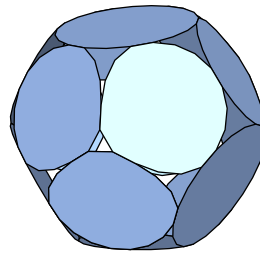

TTP6\_P18\_P21\_1\_4x3-3\_2\_3\_2\_3\_2  
 $\Delta_l = 0.0835, \Delta_a = 0.0834$

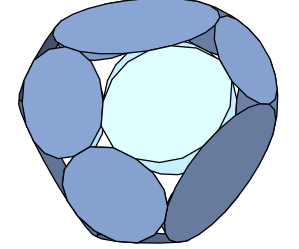

TTP6\_P16\_P24\_1\_3\_2x2\_3-6x3  
 $\Delta_l = 0.0836, \Delta_a = 0.0836$

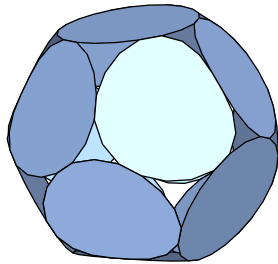

TTP6\_P19\_P21\_2\_4x3-2\_3\_2\_3\_2\_3  
 $\Delta_l = 0.0848, \Delta_a = 0.0848$

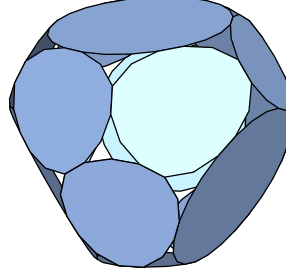

TTP6\_P15\_P24\_5x2-6x3  
 $\Delta_l = 0.0850, \Delta_a = 0.0850$

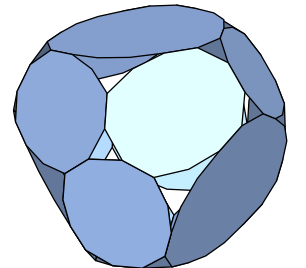

TTP6\_P12\_P18\_1\_2\_2x1\_2-1\_3\_1\_3\_1\_3  
 $\Delta_l = 0.0855, \Delta_a = 0.0216$

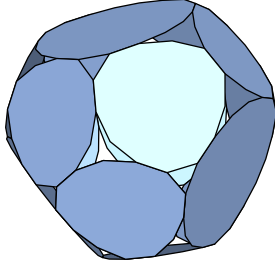

TTP6\_P13\_P18\_2\_1\_2x2\_1-3\_1\_3\_1\_3\_1  
 $\Delta_l = 0.0855, \Delta_a = 0.0450$

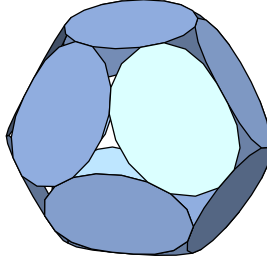

TTP6\_P18\_P18\_3\_2\_2x3\_2-6x2  
 $\Delta_l = 0.0855, \Delta_a = 0.0856$

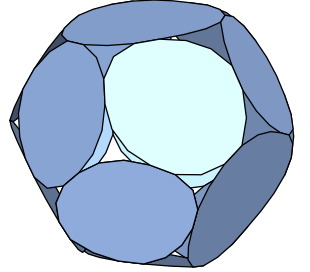

TTP6\_P17\_P21\_3\_2x2\_3\_2-3\_2\_3\_2\_3\_2  
 $\Delta_l = 0.0857, \Delta_a = 0.0856$

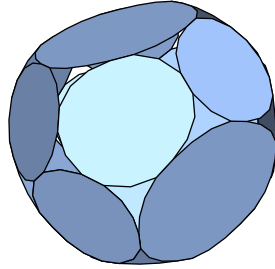

TTP6\_P17\_P24\_2x2\_3\_2\_3-6x3  
 $\Delta_l = 0.0857, \Delta_a = 0.0857$

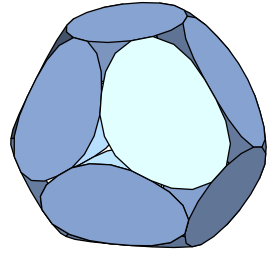

TTP6\_P20\_P18\_5x3-6x2  
 $\Delta_l = 0.0864, \Delta_a = 0.0864$

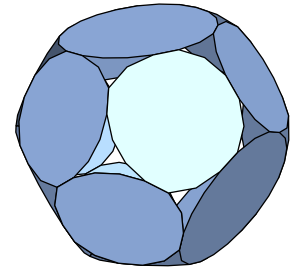

TTP6\_P16\_P21\_3\_4x2-2\_3\_2\_3\_2\_3  
 $\Delta_l = 0.0884, \Delta_a = 0.0884$

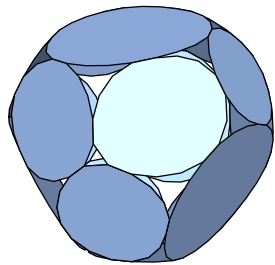

TTP6\_P17\_P24\_1\_3\_2\_2x3-6x3  
 $\Delta_l = 0.0900, \Delta_a = 0.0900$

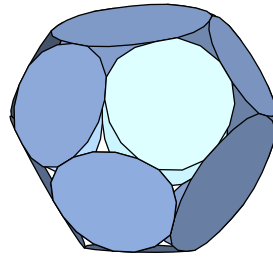

TTP6\_P18\_P24\_3\_2\_3\_2\_3-6x3  
 $\Delta_l = 0.0909, \Delta_a = 0.0909$

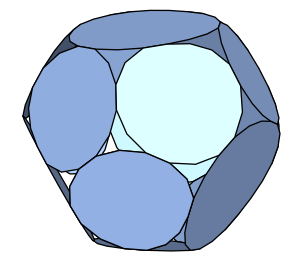

TTP6\_P16\_P21\_3x2\_3\_2-3\_2\_3\_2\_3\_2  
 $\Delta_l = 0.0909, \Delta_a = 0.0909$

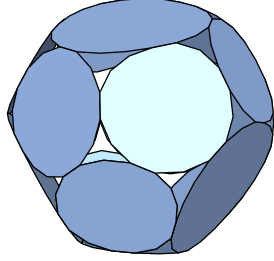

TTP6\_P16\_P21\_4x2\_3-2\_3\_2\_3\_2\_3  
 $\Delta_l = 0.0910, \Delta_a = 0.0909$

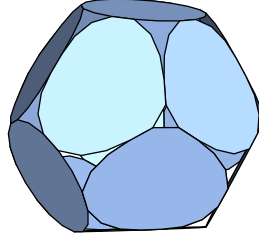

TTP6\_P18\_P18\_1\_4x3-6x2  
 $\Delta_l = 0.0912, \Delta_a = 0.0910$

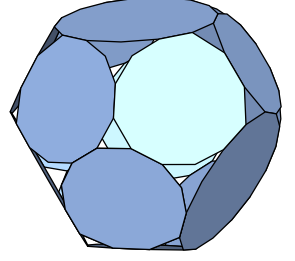

TTP6\_P12\_P15\_1\_2\_2x1\_2-1\_2\_1\_2\_1\_2  
 $\Delta_l = 0.0934, \Delta_a = 0.0935$

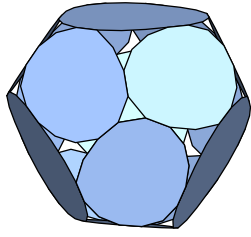

TTP6\_P15\_P21\_1\_3x2\_3-2\_3\_2\_3\_2\_3  
 $\Delta_l = 0.0941, \Delta_a = 0.0941$

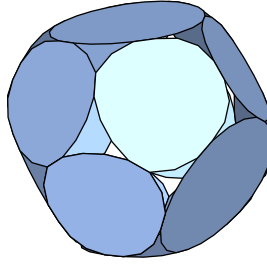

TTP6\_P18\_P24\_3\_2\_2x3\_2-6x3  
 $\Delta_l = 0.0961, \Delta_a = 0.0752$

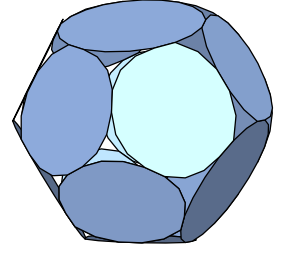

TTP6\_P18\_P21\_2x3\_2x2\_3-2\_3\_2\_3\_2\_3  
 $\Delta_l = 0.0987, \Delta_a = 0.0987$

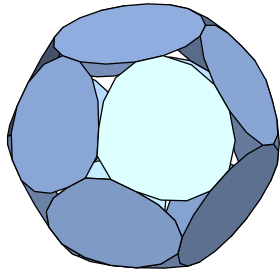

TTP6\_P16\_P18\_1\_3\_2x2\_3-6x2  
 $\Delta_l = 0.0992, \Delta_a = 0.0992$

# TCM4

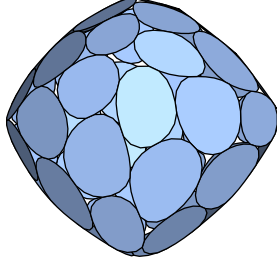

TCM4\_P20\_P24\_5x3-6x3  
 $\Delta_l = 0.0805, \Delta_a = 0.0690$

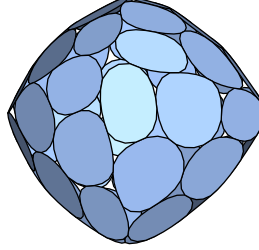

TCM4\_P20\_P23\_5x3-3\_2\_4x3  
 $\Delta_l = 0.0833, \Delta_a = 0.0833$

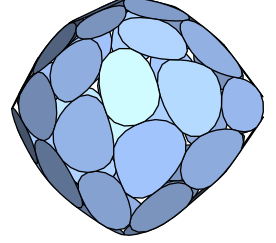

TCM4\_P20\_P23\_5x3-2\_5x3  
 $\Delta_l = 0.085, \Delta_a = 0.0848$

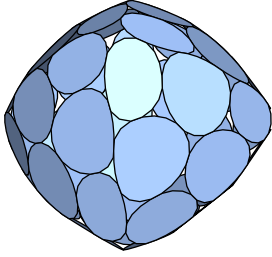

TCM4\_P19\_P22\_2x3\_2\_2x3-2\_3\_2\_3x3  
 $\Delta_l = 0.0859, \Delta_a = 0.0855$

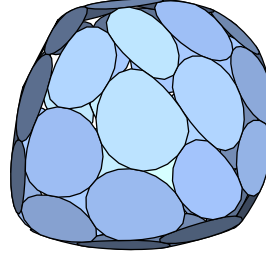

TCM4\_P19\_P23\_2x3\_2\_2x3-2x3\_2\_3x3  
 $\Delta_l = 0.0871, \Delta_a = 0.0870$

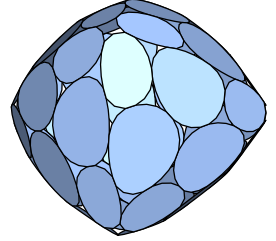

TCM4\_P18\_P24\_2\_3\_2\_2x3-6x3  
 $\Delta_l = 0.0892, \Delta_a = 0.0890$

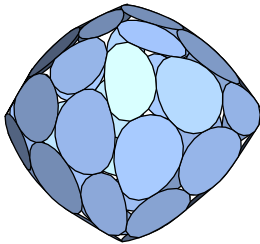

TCM4\_P18\_P23\_2\_3\_2\_2x3-3x3\_2\_2x3  
 $\Delta_l = 0.0894, \Delta_a = 0.0893$

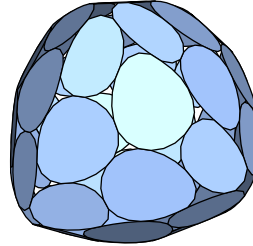

TCM4\_P18\_P22\_2\_3\_2\_2x3-2\_2x3\_2\_2x3  
 $\Delta_l = 0.0896, \Delta_a = 0.0894$

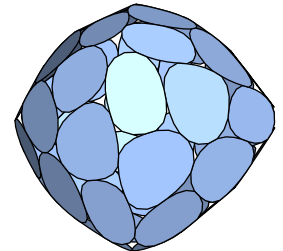

TCM4\_P20\_P22\_5x3-2x2\_4x3  
 $\Delta_l = 0.0896, \Delta_a = 0.0895$

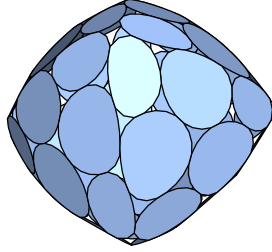

TCM4\_P18\_P23\_2\_3\_2\_2x3-2x3\_2\_3x3  
 $\Delta_l = 0.0907, \Delta_a = 0.0903$

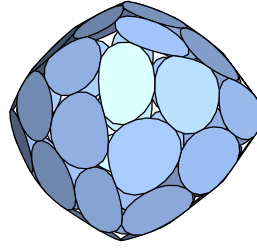

TCM4\_P19\_P21\_2x3\_2\_2x3-2\_3\_2x2\_2x3  
 $\Delta_l = 0.0909, \Delta_a = 0.0910$

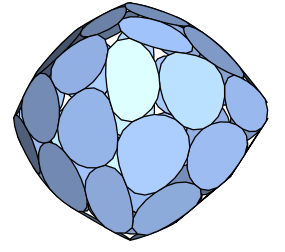

TCM4\_P18\_P21\_2\_3\_2\_2x3-2\_3\_2x2\_2x3  
 $\Delta_l = 0.0912, \Delta_a = 0.0912$

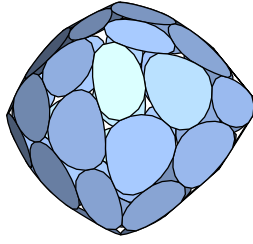

TCM4\_P18\_P22\_2\_3\_2\_2x3-2\_3\_2\_3x3  
 $\Delta_l = 0.0913, \Delta_a = 0.0912$

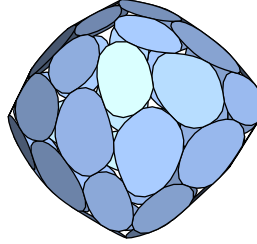

TCM4\_P19\_P24\_3x3\_2\_3-6x3  
 $\Delta_l = 0.0916, \Delta_a = 0.0913$

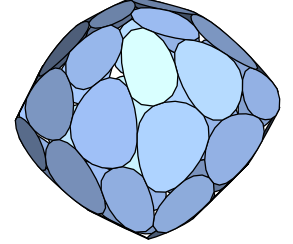

TCM4\_P18\_P23\_2\_3\_2\_2x3-2\_5x3  
 $\Delta_l = 0.0918, \Delta_a = 0.0916$

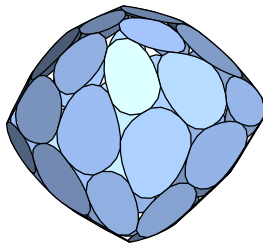

TCM4\_P18\_P23\_2\_2x3\_2\_3-2\_5x3  
 $\Delta_l = 0.0918, \Delta_a = 0.0916$

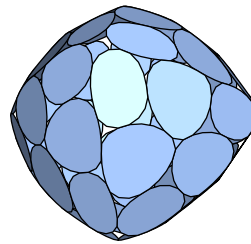

TCM4\_P19\_P21\_2x3\_2\_2x3-1\_3\_2\_3x3  
 $\Delta_l = 0.0919, \Delta_a = 0.0919$

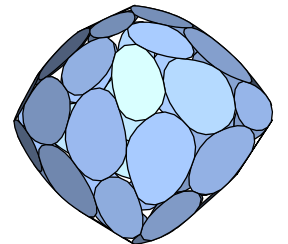

TCM4\_P18\_P24\_2\_2x3\_2\_3-6x3  
 $\Delta_l = 0.0919, \Delta_a = 0.0916$

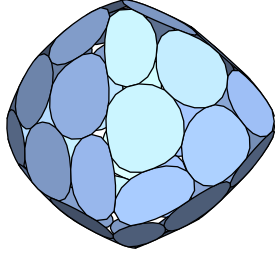

TCM4\_P18\_P21\_2\_3\_2\_2x3-3\_3x2\_2x3  
 $\Delta_l = 0.0922$ ,  $\Delta_a = 0.0920$

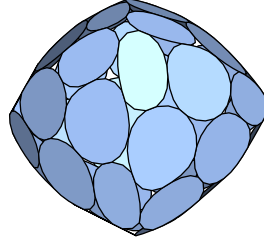

TCM4\_P18\_P22\_2\_3\_2\_2x3-3\_2\_3\_2\_2x3  
 $\Delta_l = 0.0924$ ,  $\Delta_a = 0.0848$

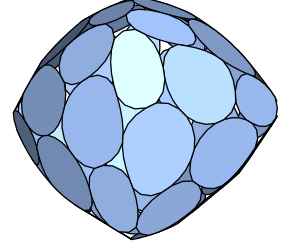

TCM4\_P18\_P23\_2\_2x3\_2\_3-3\_2\_4x3  
 $\Delta_l = 0.0926$ ,  $\Delta_a = 0.0924$

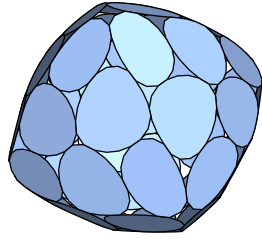

TCM4\_P18\_P20\_2\_3\_2\_2x3-1\_3\_2x2\_2x3  
 $\Delta_l = 0.0927$ ,  $\Delta_a = 0.0928$

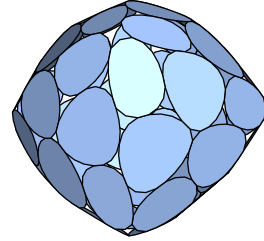

TCM4\_P18\_P21\_2\_3\_2\_2x3-1\_2x3\_2\_2x3  
 $\Delta_l = 0.0931$ ,  $\Delta_a = 0.0929$

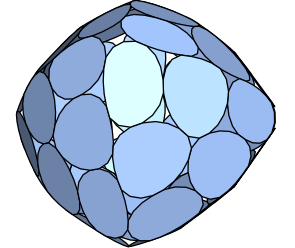

TCM4\_P19\_P20\_2x3\_2\_2x3-1\_3\_2x2\_2x3  
 $\Delta_l = 0.0933$ ,  $\Delta_a = 0.0934$

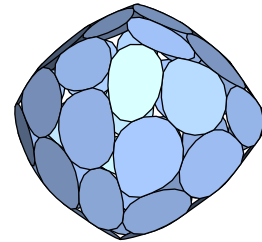

TCM4\_P17\_P20\_3\_2x2\_3\_2-3\_4x2\_3  
 $\Delta_l = 0.0934$ ,  $\Delta_a = 0.0933$

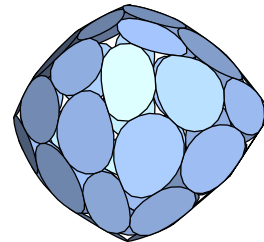

TCM4\_P19\_P23\_2x3\_2\_2x3-3x3\_2\_2x3  
 $\Delta_l = 0.0937$ ,  $\Delta_a = 0.0091$

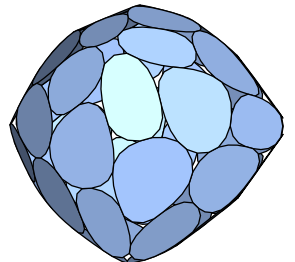

TCM4\_P19\_P22\_2\_4x3-2x2\_4x3  
 $\Delta_l = 0.0938$ ,  $\Delta_a = 0.0934$



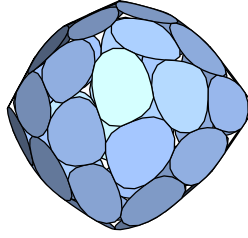

TCM4\_P19\_P20\_2x3\_2\_2x3-2\_3\_2x2\_3\_2  
 $\Delta_l = 0.0940, \Delta_a = 0.0938$

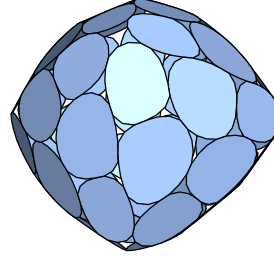

TCM4\_P19\_P22\_2x3\_2\_2x3-2x3\_2\_2x3\_2  
 $\Delta_l = 0.0940, \Delta_a = 0.0939$

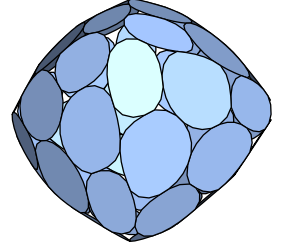

TCM4\_P19\_P23\_3x3\_2\_3-3\_2\_4x3  
 $\Delta_l = 0.0941, \Delta_a = 0.0941$

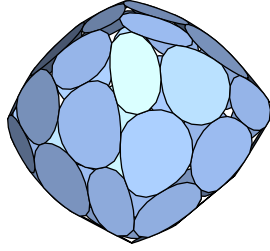

TCM4\_P18\_P22\_2\_3\_2\_2x3-3\_2x2\_3x3  
 $\Delta_l = 0.0942, \Delta_a = 0.0940$

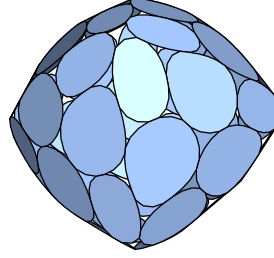

TCM4\_P19\_P23\_2\_4x3-3\_2\_4x3  
 $\Delta_l = 0.0942, \Delta_a = 0.0940$

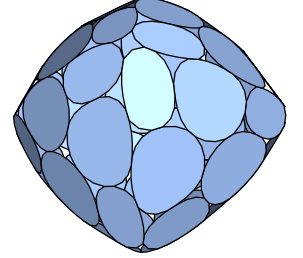

TCM4\_P18\_P23\_2\_3\_2\_2x3-3\_2\_4x3  
 $\Delta_l = 0.0944, \Delta_a = 0.0944$

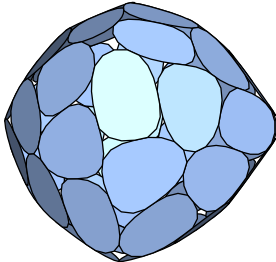

TCM4\_P20\_P20\_5x3-1\_2\_3\_2\_2x3  
 $\Delta_l = 0.0947, \Delta_a = 0.0661$

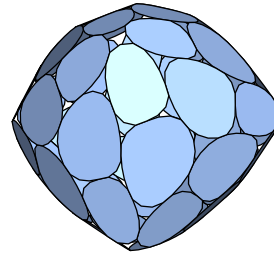

TCM4\_P18\_P22\_2\_3\_2\_2x3-2x3\_2\_2x3\_2  
 $\Delta_l = 0.0949, \Delta_a = 0.0948$

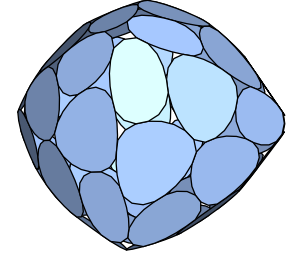

TCM4\_P18\_P21\_2\_3\_2\_2x3-1\_3\_2\_3x3  
 $\Delta_l = 0.0951, \Delta_a = 0.0951$

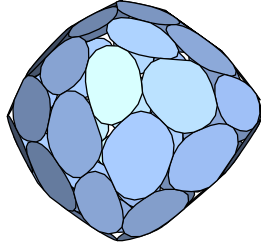

TCM4\_P19\_P23\_3x3\_2\_3-3x3\_2\_2x3  
 $\Delta_l = 0.0952, \Delta_a = 0.0768$

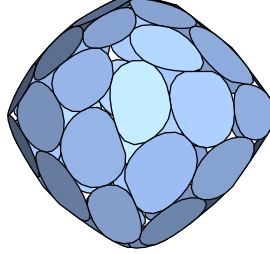

TCM4\_P20\_P23\_5x3-3x3\_2\_2x3  
 $\Delta_l = 0.0952, \Delta_a = 0.0571$

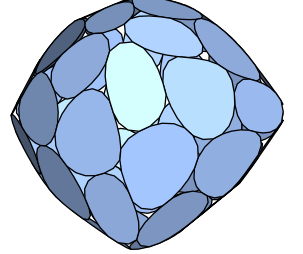

TCM4\_P19\_P22\_2\_4x3-2\_3\_2\_3x3  
 $\Delta_l = 0.0959, \Delta_a = 0.0958$

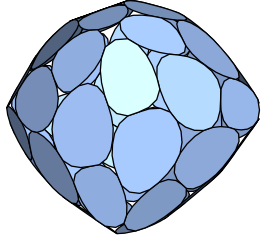

TCM4\_P18\_P22\_2\_3\_2\_2x3-3x3\_2\_3\_2  
 $\Delta_l = 0.0960, \Delta_a = 0.0959$

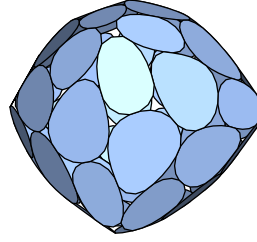

TCM4\_P19\_P23\_2\_4x3-2\_5x3  
 $\Delta_l = 0.0961, \Delta_a = 0.0961$

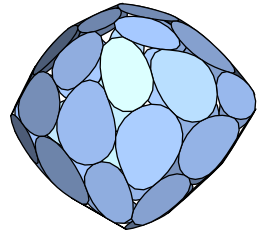

TCM4\_P19\_P24\_2\_4x3-6x3  
 $\Delta_l = 0.0964, \Delta_a = 0.0964$

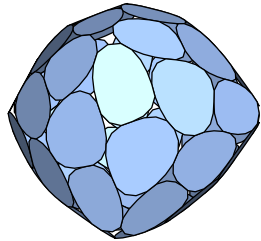

TCM4\_P18\_P20\_2\_3\_2\_2x3-2\_3\_2x2\_3\_2  
 $\Delta_l = 0.0969, \Delta_a = 0.0967$

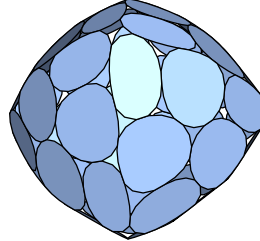

TCM4\_P18\_P20\_2\_3\_2\_2x3-4x2\_2x3  
 $\Delta_l = 0.0970, \Delta_a = 0.0970$

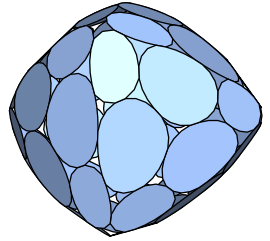

TCM4\_P17\_P24\_2\_3\_2x2\_3-6x3  
 $\Delta_l = 0.0974, \Delta_a = 0.0970$

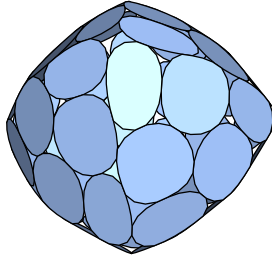

TCM4\_P19\_P21\_2x3\_2\_2x3-3\_3x2\_2x3  
 $\Delta_l = 0.0975, \Delta_a = 0.0438$

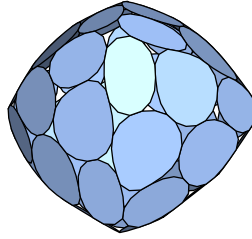

TCM4\_P16\_P19\_3x2\_3\_2-5x2\_3  
 $\Delta_l = 0.0975, \Delta_a = 0.0973$

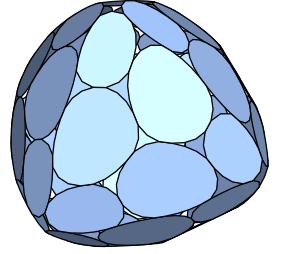

TCM4\_P17\_P23\_2\_3\_2x2\_3-2\_5x3  
 $\Delta_l = 0.0982, \Delta_a = 0.0984$

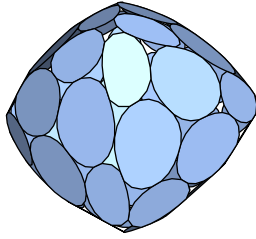

TCM4\_P17\_P23\_2\_3\_2x2\_3-3x3\_2\_2x3  
 $\Delta_l = 0.0986, \Delta_a = 0.0985$

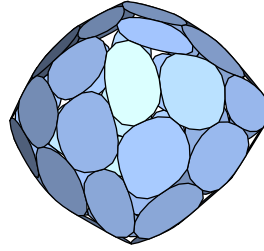

TCM4\_P18\_P20\_2\_3\_2\_2x3-3\_3x2\_3\_2  
 $\Delta_l = 0.0987, \Delta_a = 0.0986$

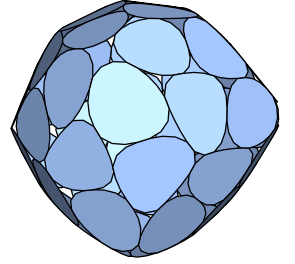

TCM4\_P20\_P20\_5x3-1\_2x3\_2x2\_3  
 $\Delta_l = 0.0988, \Delta_a = 0.0052$

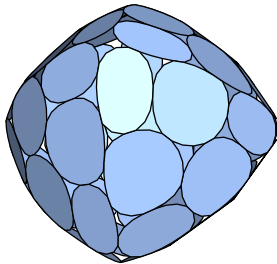

TCM4\_P19\_P22\_2x3\_2\_2x3-3\_2x2\_3x3  
 $\Delta_l = 0.0989, \Delta_a = 0.0989$

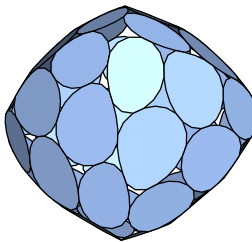

TCM4\_P17\_P20\_3\_2x2\_3\_2-2\_3\_3x2\_3  
 $\Delta_l = 0.0990, \Delta_a = 0.0989$

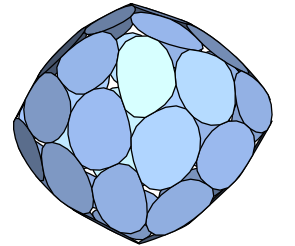

TCM4\_P19\_P21\_2x3\_2\_2x3-2x3\_2x2\_3\_2  
 $\Delta_l = 0.0997, \Delta_a = 0.0996$

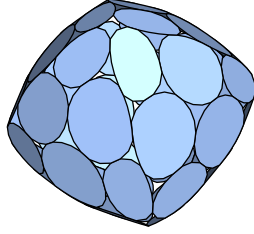

TCM4\_P17\_P21\_2\_3\_2x2\_3-3\_2x2\_2x3\_2  
 $\Delta_l = 0.0997, \Delta_a = 0.0997$

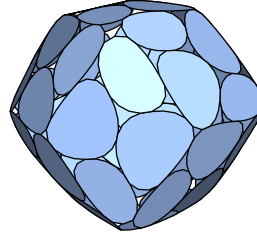

TCM4\_P19\_P22\_2\_4x3-1\_5x3  
 $\Delta_l = 0.0998, \Delta_a = 0.0997$

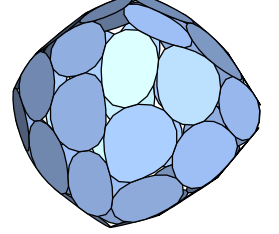

TCM4\_P17\_P19\_3\_2x2\_3\_2-5x2\_3  
 $\Delta_l = 0.0998, \Delta_a = 0.0997$

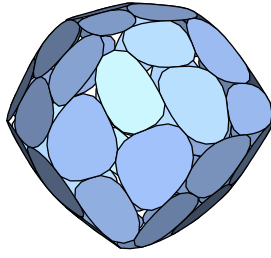

TCM4\_P19\_P22\_2\_4x3-2x3\_2\_2x3\_2  
 $\Delta_l = 0.0999, \Delta_a = 0.0998$

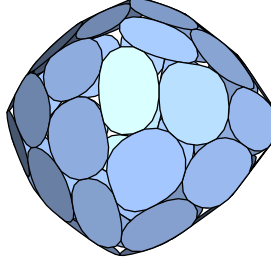

TCM4\_P20\_P22\_5x3-3\_2\_3\_2\_2x3  
 $\Delta_l = 0.0999, \Delta_a = 0.0981$

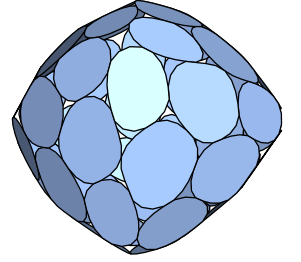

TCM4\_P19\_P22\_3x3\_2\_3-2\_2x3\_2\_2x3  
 $\Delta_l = 0.0999, \Delta_a = 0.0826$

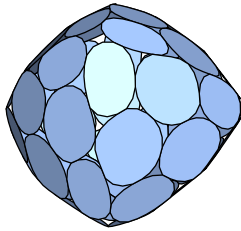

TCM4\_P19\_P22\_3x3\_2\_3-3\_2\_3\_2\_2x3  
 $\Delta_l = 0.0999, \Delta_a = 0.0999$

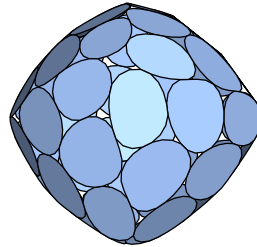

TCM4\_P20\_P22\_5x3-2\_2x3\_2\_2x3  
 $\Delta_l = 0.0999, \Delta_a = 0.0923$

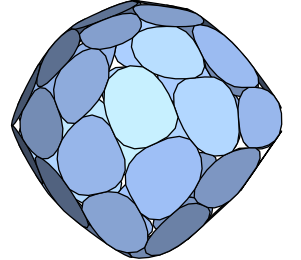

TCM4\_P20\_P22\_5x3-3x3\_2\_3\_2  
 $\Delta_l = 0.0999, \Delta_a = 0.0803$

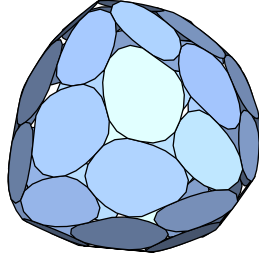

TCM4\_P18\_P22\_2\_2x3\_2\_3-2\_2x3\_2\_2x3  
 $\Delta_l = 0.1, \Delta_a = 0.0795$

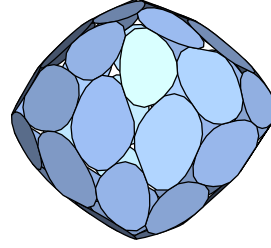

TCM4\_P18\_P22\_2\_2x3\_2\_3-3x3\_2x2\_3  
 $\Delta_l = 0.1, \Delta_a = 0.0980$

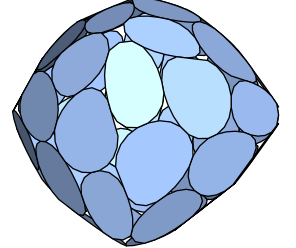

TCM4\_P19\_P22\_2\_4x3-2\_2x3\_2\_2x3  
 $\Delta_l = 0.1, \Delta_a = 0.0889$

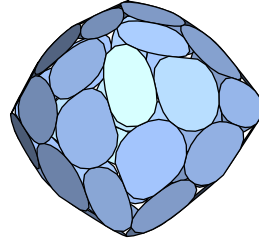

TCM4\_P19\_P22\_2\_4x3-3\_2\_3\_2\_2x3  
 $\Delta_l = 0.1, \Delta_a = 0.0486$

# SDP5

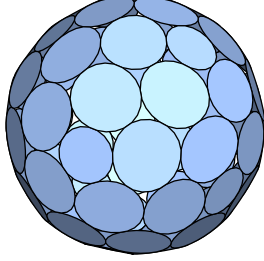

SDP5\_P20\_P24\_5x3-6x3  
 $\Delta_l = 0.0212, \Delta_a = 0.0211$

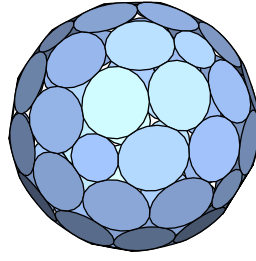

SDP5\_P15\_P21\_5x2-2x2\_2x3\_2\_3  
 $\Delta_l = 0.0214, \Delta_a = 0.0189$

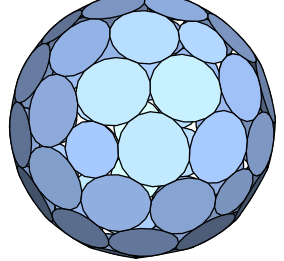

SDP5\_P15\_P19\_5x2-4x2\_3\_2  
 $\Delta_l = 0.0229, \Delta_a = 0.0228$

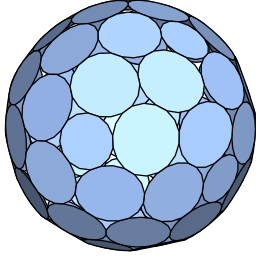

SDP5\_P15\_P18\_5x2-6x2  
 $\Delta_l = 0.0261, \Delta_a = 0.0261$

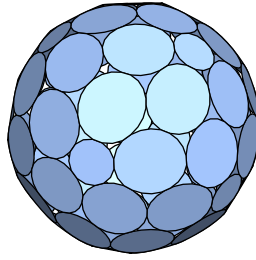

SDP5\_P15\_P22\_5x2-2x2\_4x3  
 $\Delta_l = 0.0283, \Delta_a = 0.0283$

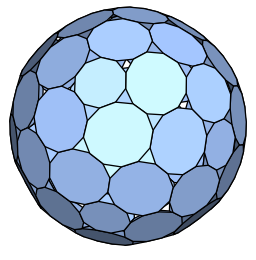

SDP5\_P10\_P12\_5x1-6x1  
 $\Delta_l = 0.0326, \Delta_a = 0.0326$

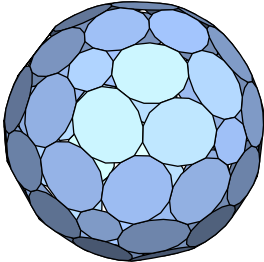

SDP5\_P10\_P15\_5x1-2x1\_2x2\_1\_2  
 $\Delta_l = 0.0443, \Delta_a = 0.0187$

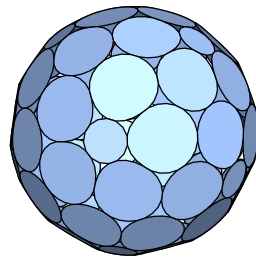

SDP5\_P15\_P24\_5x2-6x3  
 $\Delta_l = 0.0453, \Delta_a = 0.0452$

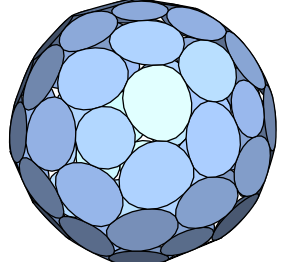

SDP5\_P20\_P23\_5x3-4x3\_2\_3  
 $\Delta_l = 0.0464, \Delta_a = 0.0464$

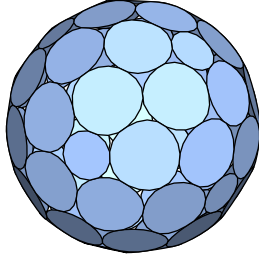

SDP5\_P15\_P21\_5x2-2x2\_3\_2\_2x3  
 $\Delta_l = 0.0472, \Delta_a = 0.0472$

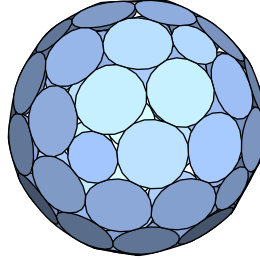

SDP5\_P15\_P20\_5x2-3x2\_3\_2\_3  
 $\Delta_l = 0.0496, \Delta_a = 0.0495$

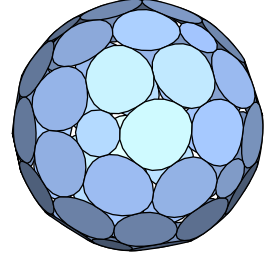

SDP5\_P15\_P23\_5x2-4x3\_2\_3  
 $\Delta_l = 0.0499, \Delta_a = 0.0498$

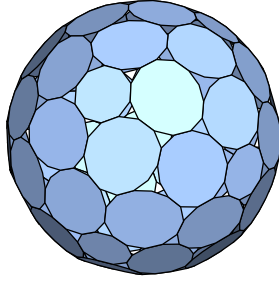

SDP5\_P10\_P13\_5x1-4x1\_2\_1  
 $\Delta_l = 0.0513, \Delta_a = 0.0513$

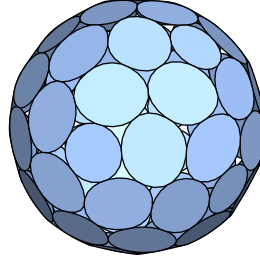

SDP5\_P20\_P23\_5x3-2x3\_2\_3x3  
 $\Delta_l = 0.0517, \Delta_a = 0.0517$

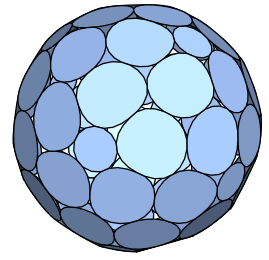

SDP5\_P15\_P23\_5x2-2x3\_2\_3x3  
 $\Delta_l = 0.0521, \Delta_a = 0.0520$

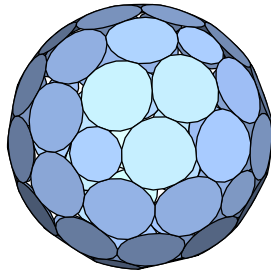

SDP5\_P15\_P20\_5x2-2x2\_3\_2\_3\_2  
 $\Delta_l = 0.0542, \Delta_a = 0.0541$

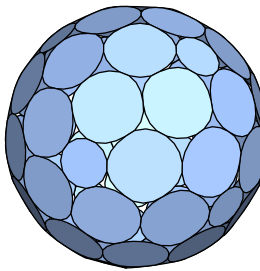

SDP5\_P15\_P22\_5x2-2x3\_2\_2x3\_2  
 $\Delta_l = 0.0554, \Delta_a = 0.0554$

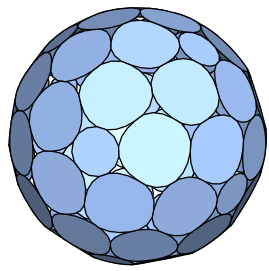

SDP5\_P15\_P22\_5x2-2x3\_2\_3\_2\_3  
 $\Delta_l = 0.0559, \Delta_a = 0.0558$

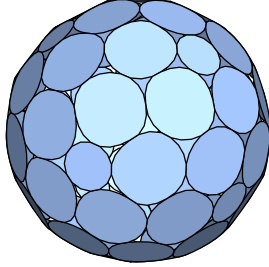

SDP5\_P15\_P22\_5x2-3x3\_2\_3\_2  
 $\Delta_l = 0.0559, \Delta_a = 0.0558$

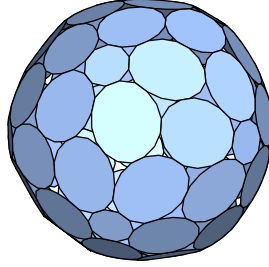

SDP5\_P10\_P16\_5x1-2x1\_4x2  
 $\Delta_l = 0.0571, \Delta_a = 0.0571$

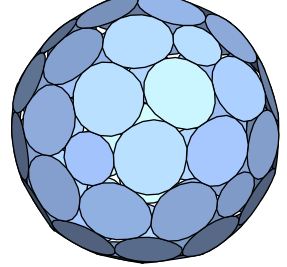

SDP5\_P15\_P20\_5x2-2x2\_3\_2x2\_3  
 $\Delta_l = 0.0573, \Delta_a = 0.0573$

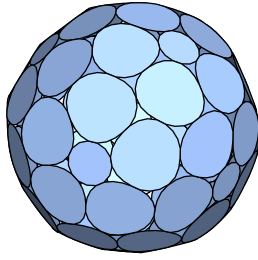

SDP5\_P15\_P23\_5x2-3x3\_2\_2x3  
 $\Delta_l = 0.0584, \Delta_a = 0.0585$

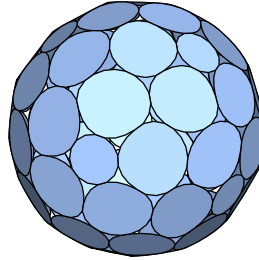

SDP5\_P15\_P21\_5x2-2x3\_2x2\_3\_2  
 $\Delta_l = 0.0587, \Delta_a = 0.0587$

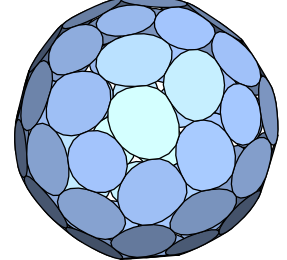

SDP5\_P20\_P22\_5x3-2x3\_2\_3\_2\_3  
 $\Delta_l = 0.0599, \Delta_a = 0.0597$

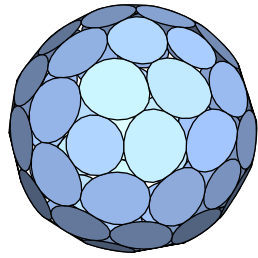

SDP5\_P20\_P22\_5x3-2x3\_2\_2x3\_2  
 $\Delta_l = 0.0603, \Delta_a = 0.0588$

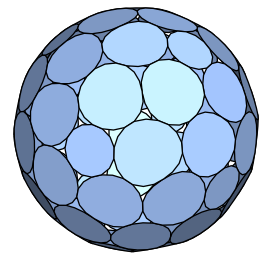

SDP5\_P15\_P19\_5x2-3x2\_3\_2x2  
 $\Delta_l = 0.0620, \Delta_a = 0.0620$

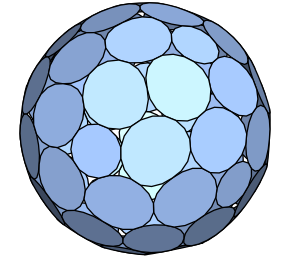

SDP5\_P15\_P19\_5x2-2x2\_3\_3x2  
 $\Delta_l = 0.0626, \Delta_a = 0.0627$



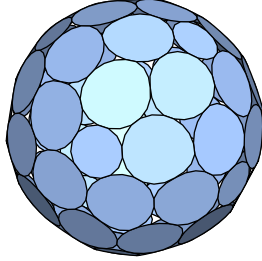

SDP5\_P15\_P20\_5x2-3x2\_2x3\_2  
 $\Delta_l = 0.0627, \Delta_a = 0.0627$

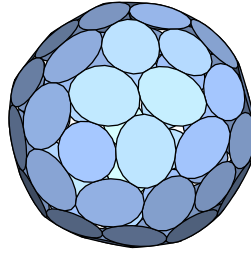

SDP5\_P20\_P21\_5x3-2x3\_2x2\_3\_2  
 $\Delta_l = 0.0632, \Delta_a = 0.0631$

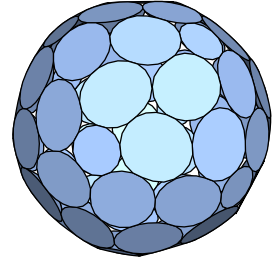

SDP5\_P15\_P21\_5x2-3x2\_3x3  
 $\Delta_l = 0.0637, \Delta_a = 0.0637$

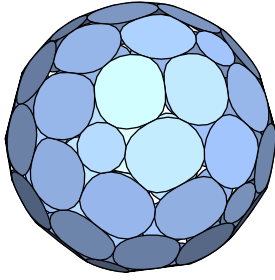

SDP5\_P15\_P23\_5x2-5x3\_2  
 $\Delta_l = 0.0656, \Delta_a = 0.0656$

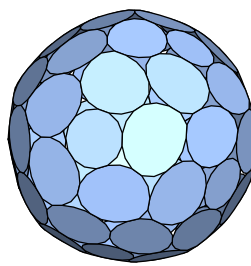

SDP5\_P15\_P17\_5x2-4x2\_1\_2  
 $\Delta_l = 0.0673, \Delta_a = 0.0673$

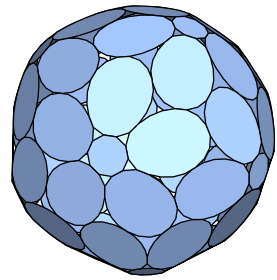

SDP5\_P10\_P19\_5x1-2x1\_2x3\_2\_3  
 $\Delta_l = 0.0675, \Delta_a = 0.0675$

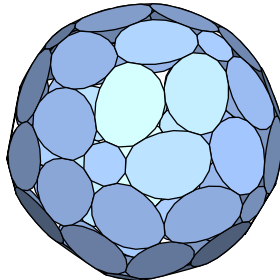

SDP5\_P10\_P18\_5x1-2x1\_2x3\_1\_3  
 $\Delta_l = 0.0680, \Delta_a = 0.0661$

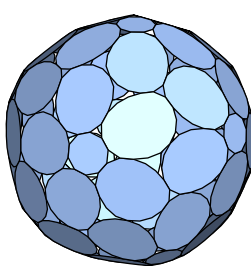

SDP5\_P10\_P17\_5x1-2x1\_2\_3\_1\_3  
 $\Delta_l = 0.0687, \Delta_a = 0.0686$

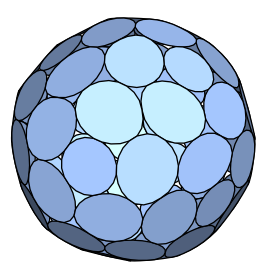

SDP5\_P20\_P22\_5x3-3x3\_2\_3\_2  
 $\Delta_l = 0.0699, \Delta_a = 0.0698$

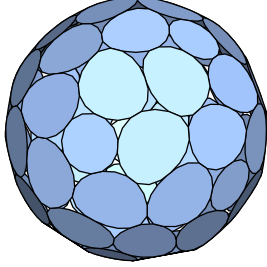

SDP5\_P15\_P18\_5x2-3x2\_3\_1\_2  
 $\Delta_l = 0.0700, \Delta_a = 0.0700$

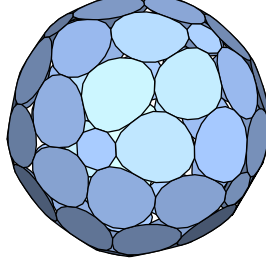

SDP5\_P10\_P19\_5x1-4x2\_3\_2  
 $\Delta_l = 0.0721, \Delta_a = 0.0720$

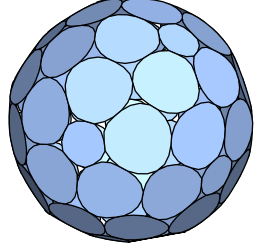

SDP5\_P15\_P22\_5x2-3\_2\_3\_2\_2x3  
 $\Delta_l = 0.0723, \Delta_a = 0.0722$

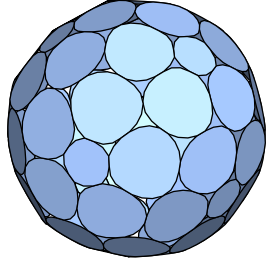

SDP5\_P15\_P22\_5x2-2\_2x3\_2\_2x3  
 $\Delta_l = 0.0723, \Delta_a = 0.0723$

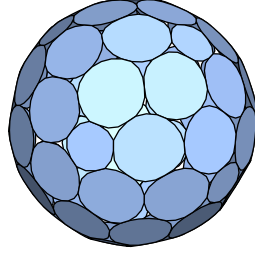

SDP5\_P15\_P21\_5x2-2\_3\_2\_2x3\_2  
 $\Delta_l = 0.0724, \Delta_a = 0.0724$

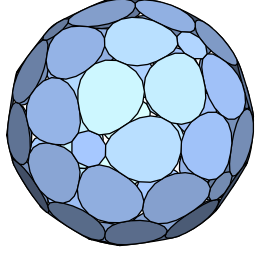

SDP5\_P10\_P20\_5x1-2x2\_3\_2x2\_3  
 $\Delta_l = 0.0724, \Delta_a = 0.0723$

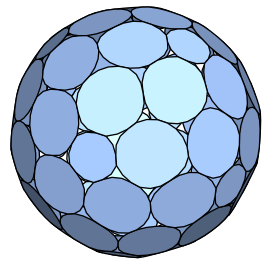

SDP5\_P15\_P21\_5x2-3\_2x2\_2x3\_2  
 $\Delta_l = 0.0724, \Delta_a = 0.0723$

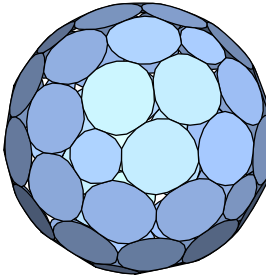

SDP5\_P15\_P21\_5x2-2\_2x3\_2\_3\_2  
 $\Delta_l = 0.0729, \Delta_a = 0.0729$

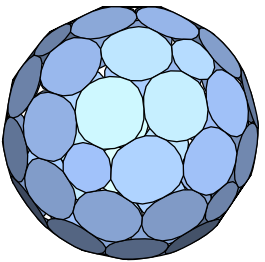

SDP5\_P15\_P21\_5x2-3\_2\_3\_2\_3\_2  
 $\Delta_l = 0.0729, \Delta_a = 0.0730$

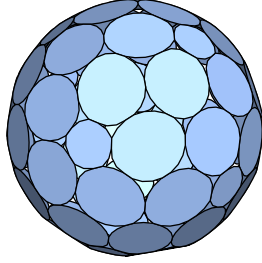

SDP5\_P15\_P22\_5x2-2\_3x3\_2\_3  
 $\Delta_l = 0.0736, \Delta_a = 0.0735$

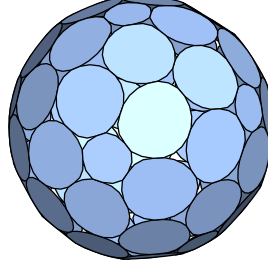

SDP5\_P15\_P22\_5x2-3\_2\_2x3\_2\_3  
 $\Delta_l = 0.0736, \Delta_a = 0.0736$

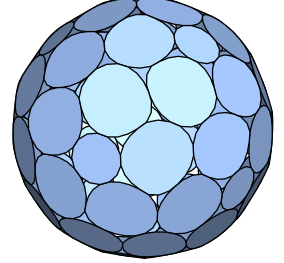

SDP5\_P15\_P21\_5x2-2x3\_2\_3\_2x2  
 $\Delta_l = 0.0739, \Delta_a = 0.0738$

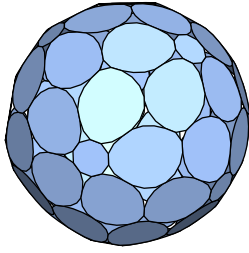

SDP5\_P10\_P19\_5x1-3x2\_3\_1\_3  
 $\Delta_l = 0.0741, \Delta_a = 0.0741$

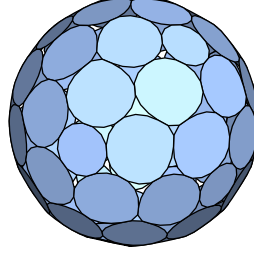

SDP5\_P15\_P19\_5x2-3x2\_3\_1\_3  
 $\Delta_l = 0.0743, \Delta_a = 1.1968$

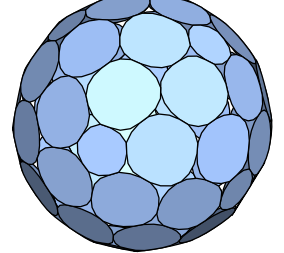

SDP5\_P15\_P21\_5x2-2\_3\_2\_3\_2\_3  
 $\Delta_l = 0.0746, \Delta_a = 0.0746$

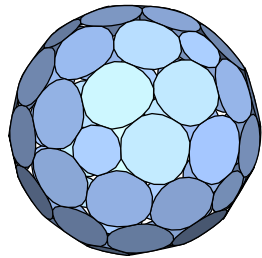

SDP5\_P15\_P21\_5x2-3\_2x2\_3\_2\_3  
 $\Delta_l = 0.0747, \Delta_a = 0.0747$

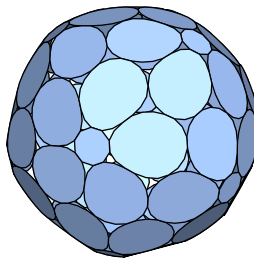

SDP5\_P10\_P20\_5x1-3x2\_3\_2\_3  
 $\Delta_l = 0.0750, \Delta_a = 0.0750$

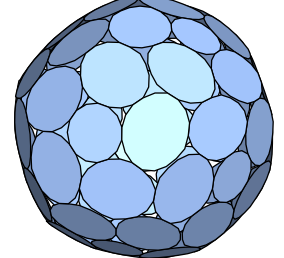

SDP5\_P15\_P18\_5x2-2x2\_3\_1\_2x2  
 $\Delta_l = 0.0752, \Delta_a = 0.0752$

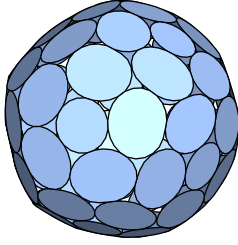

SDP5\_P20\_P23\_5x3-3x3\_2\_2x3  
 $\Delta_l = 0.0754, \Delta_a = 0.0754$

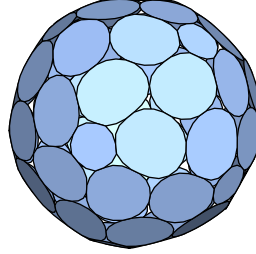

SDP5\_P15\_P22\_5x2-3\_2x2\_3x3  
 $\Delta_l = 0.0761, \Delta_a = 0.0762$

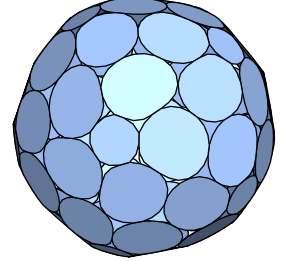

SDP5\_P15\_P22\_5x2-2\_3\_2\_3x3  
 $\Delta_l = 0.0762, \Delta_a = 0.0761$

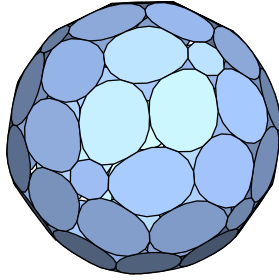

SDP5\_P10\_P19\_5x1-2x2\_3\_3x2  
 $\Delta_l = 0.0764, \Delta_a = 0.0763$

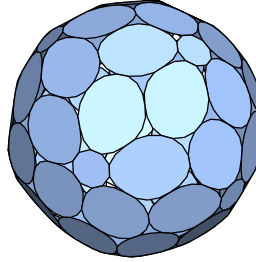

SDP5\_P10\_P19\_5x1-3x2\_3\_2x2  
 $\Delta_l = 0.0765, \Delta_a = 0.0765$

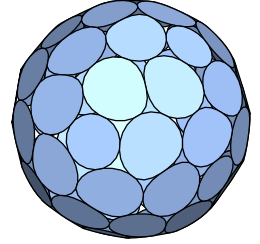

SDP5\_P20\_P23\_5x3-5x3\_2  
 $\Delta_l = 0.0766, \Delta_a = 0.0767$

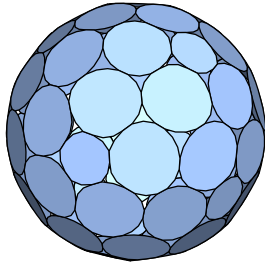

SDP5\_P15\_P20\_5x2-2\_3\_2x2\_3\_2  
 $\Delta_l = 0.0769, \Delta_a = 0.0770$

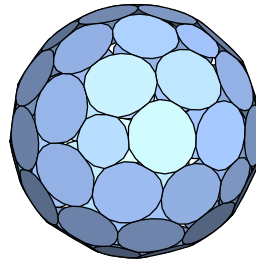

SDP5\_P15\_P20\_5x2-3\_3x2\_3\_2  
 $\Delta_l = 0.0770, \Delta_a = 0.0770$

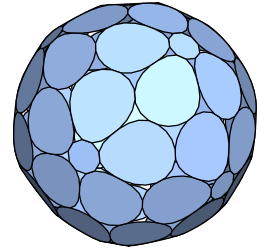

SDP5\_P10\_P21\_5x1-2x2\_3\_2\_2x3  
 $\Delta_l = 0.0772, \Delta_a = 0.0770$

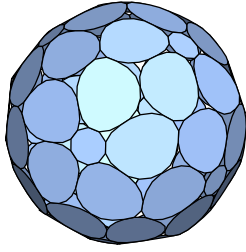

SDP5\_P10\_P19\_5x1-2x2\_3\_2\_1\_3  
 $\Delta_l = 0.0772, \Delta_a = 0.0772$

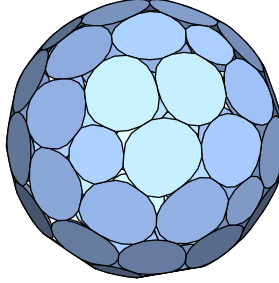

SDP5\_P15\_P20\_5x2-3\_2x2\_3\_2x2  
 $\Delta_l = 0.0774, \Delta_a = 0.0773$

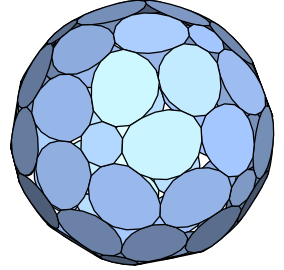

SDP5\_P10\_P17\_5x1-2x1\_3\_2\_1\_3  
 $\Delta_l = 0.0774, \Delta_a = 0.0771$

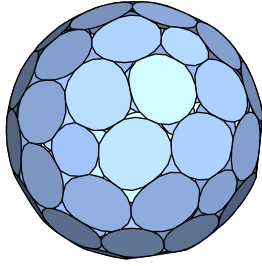

SDP5\_P15\_P20\_5x2-2\_3\_2\_3\_2x2  
 $\Delta_l = 0.0775, \Delta_a = 0.0774$

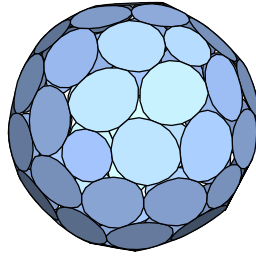

SDP5\_P15\_P19\_5x2-2x2\_1\_2x3\_2  
 $\Delta_l = 0.0777, \Delta_a = 0.0772$

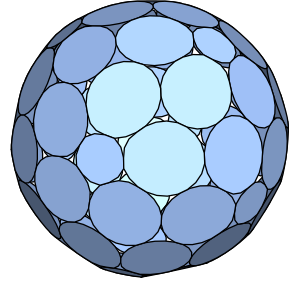

SDP5\_P15\_P23\_5x2-3\_2\_4x3  
 $\Delta_l = 0.0779, \Delta_a = 0.0779$

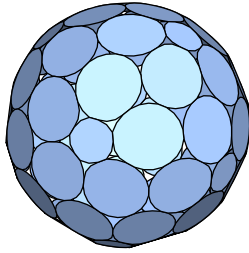

SDP5\_P15\_P23\_5x2-2\_5x3  
 $\Delta_l = 0.0779, \Delta_a = 0.0779$

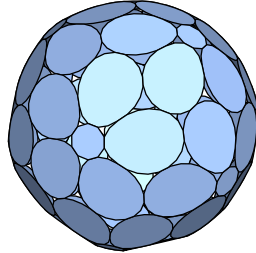

SDP5\_P10\_P21\_5x1-2x2\_2x3\_2\_3  
 $\Delta_l = 0.0781, \Delta_a = 0.0780$

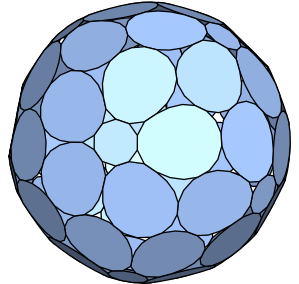

SDP5\_P10\_P18\_5x1-2x1\_3\_2x2\_3  
 $\Delta_l = 0.0781, \Delta_a = 0.0780$

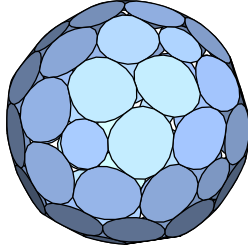

SDP5\_P15\_P20\_5x2-2x3\_4x2  
 $\Delta_l = 0.0784, \Delta_a = 0.0784$

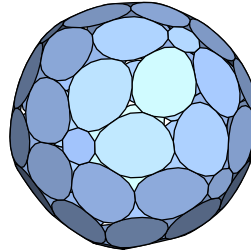

SDP5\_P10\_P20\_5x1-2x2\_3\_2\_3\_2  
 $\Delta_l = 0.0786, \Delta_a = 0.0785$

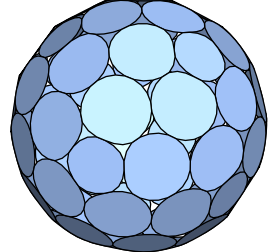

SDP5\_P20\_P23\_5x3-2\_5x3  
 $\Delta_l = 0.0787, \Delta_a = 0.0786$

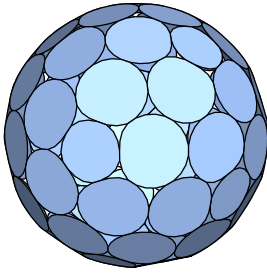

SDP5\_P20\_P23\_5x3-3\_2\_4x3  
 $\Delta_l = 0.0787, \Delta_a = 0.0785$

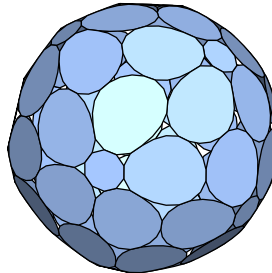

SDP5\_P10\_P19\_5x1-2x1\_3\_2\_2x3  
 $\Delta_l = 0.0787, \Delta_a = 0.0787$

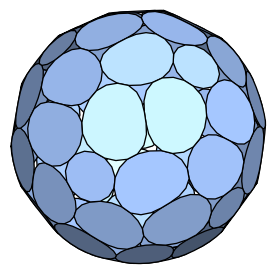

SDP5\_P15\_P20\_5x2-2x2\_2x3\_2x2  
 $\Delta_l = 0.0790, \Delta_a = 0.0790$

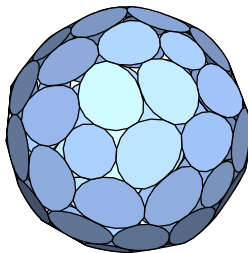

SDP5\_P15\_P18\_5x2-2x2\_3\_2\_1\_2  
 $\Delta_l = 0.0794, \Delta_a = 0.0794$

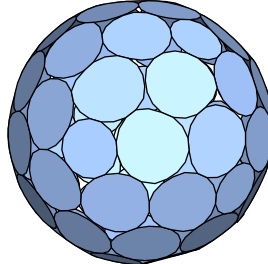

SDP5\_P15\_P18\_5x2-2x2\_1\_3\_2x2  
 $\Delta_l = 0.0795, \Delta_a = 0.0796$

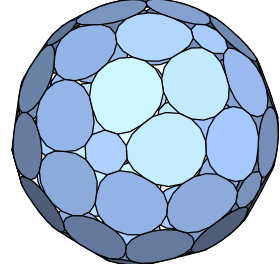

SDP5\_P10\_P18\_5x1-6x2  
 $\Delta_l = 0.0799, \Delta_a = 0.0798$

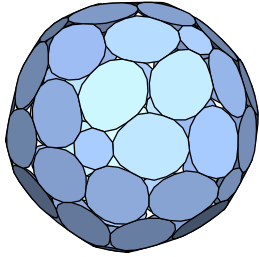

SDP5\_P10\_P18\_5x1-2x2\_1\_3\_2x2  
 $\Delta_l = 0.0802, \Delta_a = 0.0800$

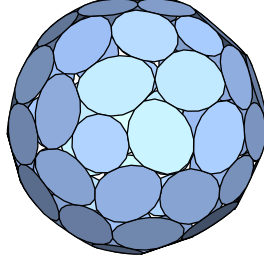

SDP5\_P15\_P18\_5x2-2x2\_1\_2\_3\_2  
 $\Delta_l = 0.0804, \Delta_a = 0.0804$

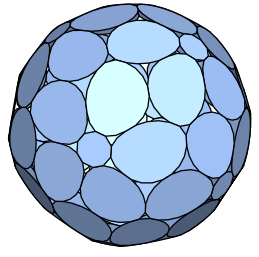

SDP5\_P10\_P20\_5x1-2x2\_2x3\_1\_3  
 $\Delta_l = 0.0804, \Delta_a = 0.0803$

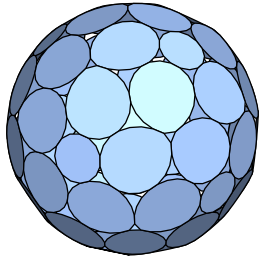

SDP5\_P15\_P20\_5x2-2x2\_2x3\_1\_3  
 $\Delta_l = 0.0807, \Delta_a = 0.0805$

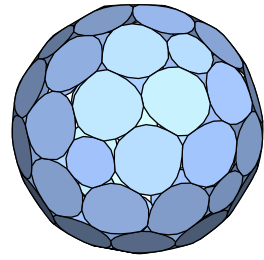

SDP5\_P15\_P20\_5x2-3\_2x2\_3\_1\_3  
 $\Delta_l = 0.0808, \Delta_a = 0.0807$

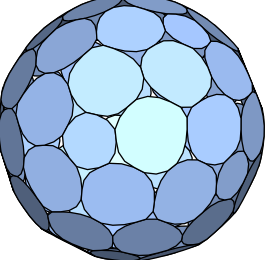

SDP5\_P15\_P20\_5x2-2\_3\_2\_3\_1\_3  
 $\Delta_l = 0.0808, \Delta_a = 0.0806$

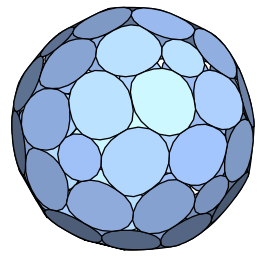

SDP5\_P15\_P21\_5x2-3x3\_3x2  
 $\Delta_l = 0.0812, \Delta_a = 0.0811$

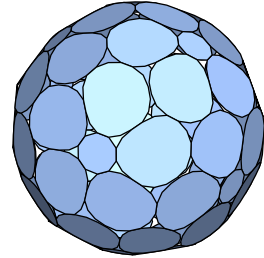

SDP5\_P10\_P18\_5x1-2x2\_3\_1\_2x2  
 $\Delta_l = 0.0813, \Delta_a = 0.0812$

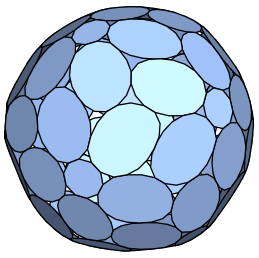

SDP5\_P10\_P17\_5x1-2x1\_3\_3x2  
 $\Delta_l = 0.0816, \Delta_a = 0.0816$

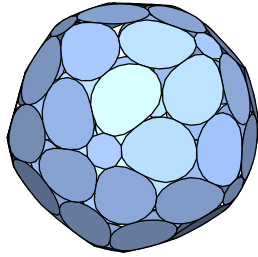

SDP5\_P10\_P21\_5x1-3x2\_3x3  
 $\Delta_l = 0.0816, \Delta_a = 0.0814$

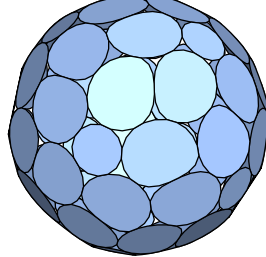

SDP5\_P15\_P21\_5x2-2x2\_3x3\_2  
 $\Delta_l = 0.0820, \Delta_a = 0.0819$

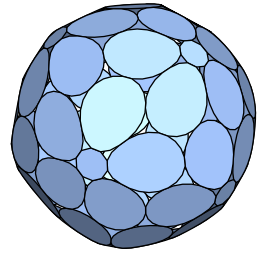

SDP5\_P10\_P22\_5x1-2x2\_4x3  
 $\Delta_l = 0.0820, \Delta_a = 0.0820$

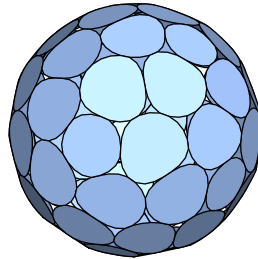

SDP5\_P20\_P22\_5x3-3\_2\_3x3\_2  
 $\Delta_l = 0.0822, \Delta_a = 0.0822$

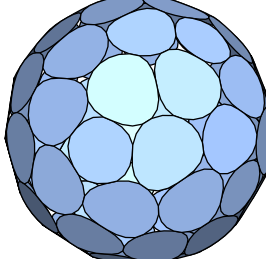

SDP5\_P20\_P22\_5x3-2\_4x3\_2  
 $\Delta_l = 0.0822, \Delta_a = 0.0823$

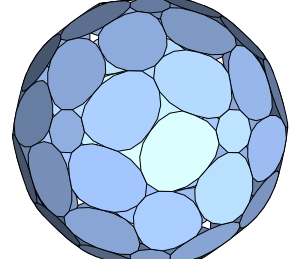

SDP5\_P10\_P18\_5x1-2x2\_3\_2\_1\_2  
 $\Delta_l = 0.0824, \Delta_a = 0.0823$

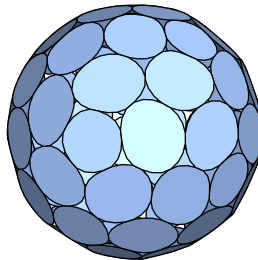

SDP5\_P20\_P22\_5x3-2\_3\_2\_3x3  
 $\Delta_l = 0.0825, \Delta_a = 0.0825$

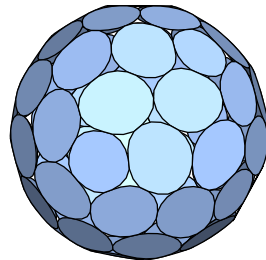

SDP5\_P20\_P22\_5x3-3\_2x2\_3x3  
 $\Delta_l = 0.0826, \Delta_a = 0.0825$

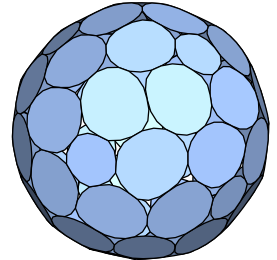

SDP5\_P15\_P20\_5x2-3\_2\_3\_3x2  
 $\Delta_l = 0.0827, \Delta_a = 0.0826$



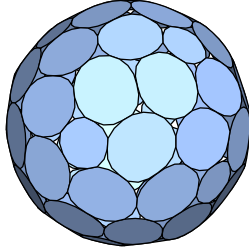

SDP5\_P15\_P20\_5x2-2\_2x3\_3x2  
 $\Delta_l = 0.0826, \Delta_a = 0.0827$

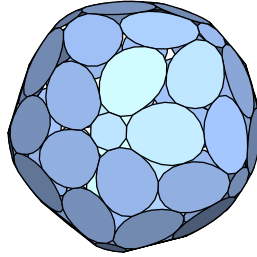

SDP5\_P10\_P20\_5x1-2x1\_4x3  
 $\Delta_l = 0.0831, \Delta_a = 0.0831$

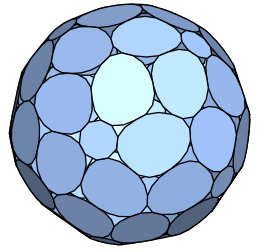

SDP5\_P10\_P18\_5x1-3x2\_3\_1\_2  
 $\Delta_l = 0.0833, \Delta_a = 0.0832$

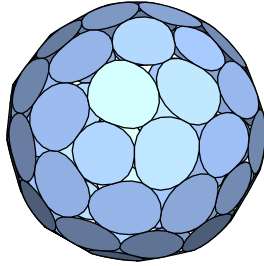

SDP5\_P20\_P22\_5x3-2\_3x3\_2\_3  
 $\Delta_l = 0.0835, \Delta_a = 0.0835$

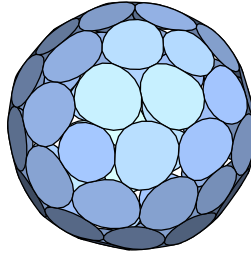

SDP5\_P20\_P22\_5x3-3\_2\_2x3\_2\_3  
 $\Delta_l = 0.0835, \Delta_a = 0.0835$

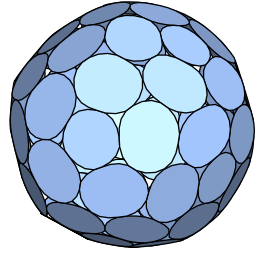

SDP5\_P20\_P22\_5x3-3\_2\_3\_2\_2x3  
 $\Delta_l = 0.0836, \Delta_a = 0.0836$

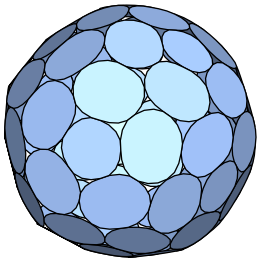

SDP5\_P20\_P22\_5x3-2\_2x3\_2\_2x3  
 $\Delta_l = 0.0836, \Delta_a = 0.0835$

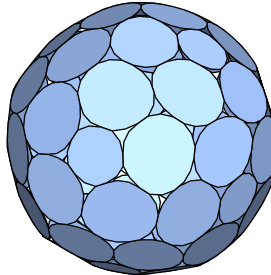

SDP5\_P15\_P19\_5x2-3\_5x2  
 $\Delta_l = 0.0841, \Delta_a = 0.0840$

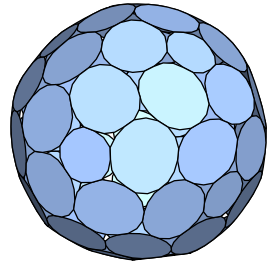

SDP5\_P15\_P19\_5x2-2\_3\_4x2  
 $\Delta_l = 0.0841, \Delta_a = 0.0839$

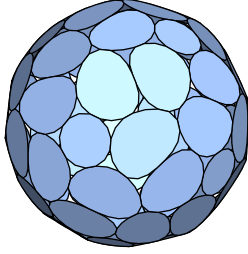

SDP5\_P15\_P19\_5x2-2x2\_2x3\_1\_2  
 $\Delta_l = 0.0841, \Delta_a = 0.0840$

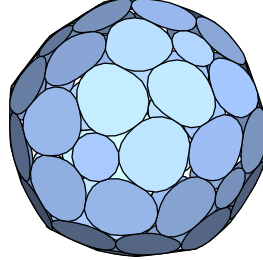

SDP5\_P15\_P22\_5x2-3x3\_2x2\_3  
 $\Delta_l = 0.0842, \Delta_a = 0.0841$

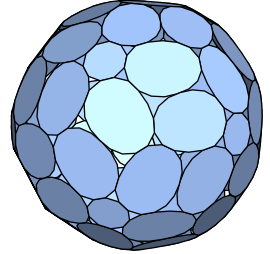

SDP5\_P10\_P16\_5x1-2x1\_3\_2\_1\_2  
 $\Delta_l = 0.0846, \Delta_a = 0.0845$

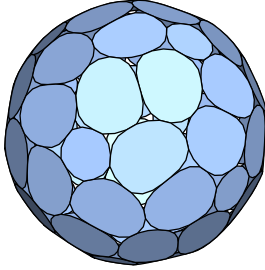

SDP5\_P15\_P21\_5x2-3\_2\_2x3\_2x2  
 $\Delta_l = 0.0849, \Delta_a = 0.0848$

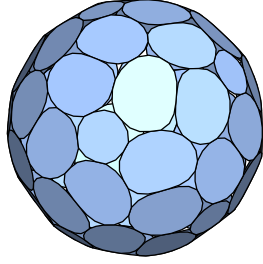

SDP5\_P15\_P21\_5x2-2\_3x3\_2x2  
 $\Delta_l = 0.0849, \Delta_a = 0.0849$

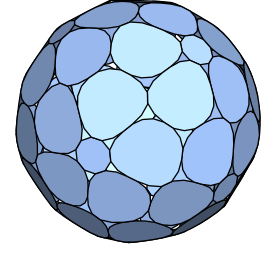

SDP5\_P10\_P19\_5x1-5x2\_3  
 $\Delta_l = 0.0853, \Delta_a = 0.0853$

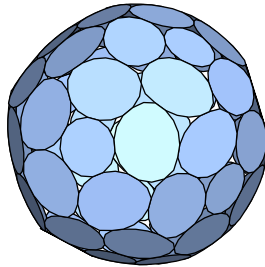

SDP5\_P15\_P18\_5x2-3x2\_1\_3\_2  
 $\Delta_l = 0.0857, \Delta_a = 0.0858$

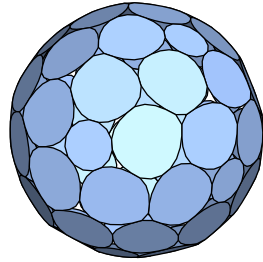

SDP5\_P15\_P21\_5x2-2x3\_2\_3\_1\_3  
 $\Delta_l = 0.0861, \Delta_a = 0.0860$

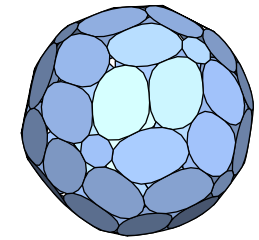

SDP5\_P10\_P20\_5x1-2x2\_2x3\_2x2  
 $\Delta_l = 0.0862, \Delta_a = 0.0861$

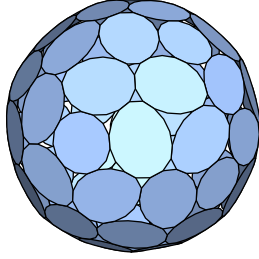

SDP5\_P15\_P16\_5x2-2x2\_2x1\_3\_1  
 $\Delta_l = 0.0862, \Delta_a = 0.0860$

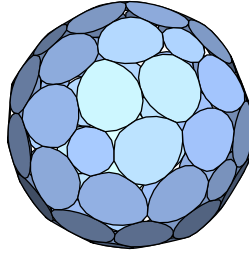

SDP5\_P15\_P21\_5x2-3\_2\_2x3\_1\_3  
 $\Delta_l = 0.0870, \Delta_a = 0.0869$

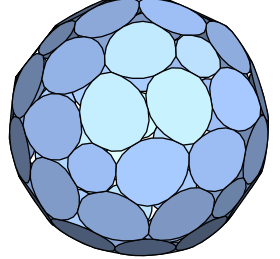

SDP5\_P15\_P21\_5x2-2\_3x3\_1\_3  
 $\Delta_l = 0.0870, \Delta_a = 0.0866$

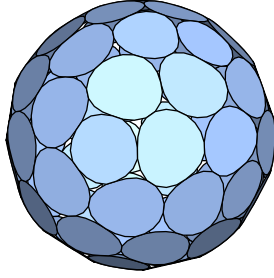

SDP5\_P20\_P21\_5x3-3\_2x2\_2x3\_2  
 $\Delta_l = 0.0872, \Delta_a = 0.0871$

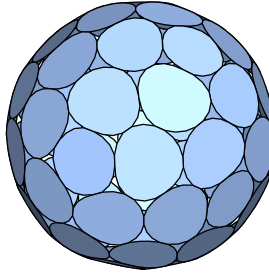

SDP5\_P20\_P21\_5x3-2\_3\_2\_2x3\_2  
 $\Delta_l = 0.0872, \Delta_a = 0.0872$

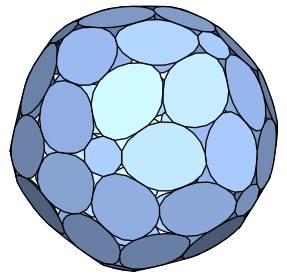

SDP5\_P10\_P20\_5x1-3x2\_2x3\_2  
 $\Delta_l = 0.0874, \Delta_a = 0.0874$

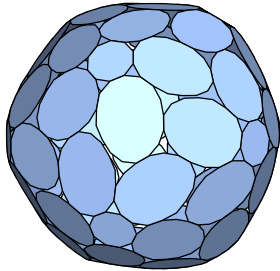

SDP5\_P10\_P16\_5x1-3x1\_3\_2x2  
 $\Delta_l = 0.0876, \Delta_a = 0.0874$

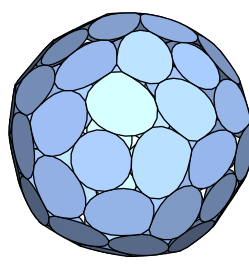

SDP5\_P20\_P21\_5x3-2x3\_2\_3\_1\_3  
 $\Delta_l = 0.0876, \Delta_a = 0.0874$

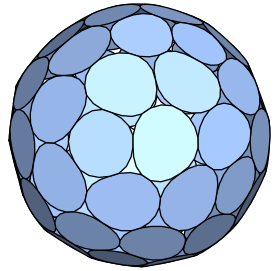

SDP5\_P20\_P21\_5x3-2\_2x3\_2\_3\_2  
 $\Delta_l = 0.0877, \Delta_a = 0.0876$

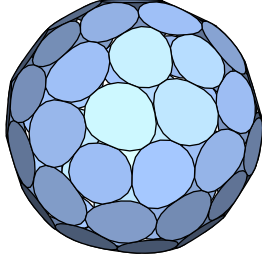

SDP5\_P20\_P21\_5x3-3\_2\_3\_2\_3\_2  
 $\Delta_l = 0.0877, \Delta_a = 0.0876$

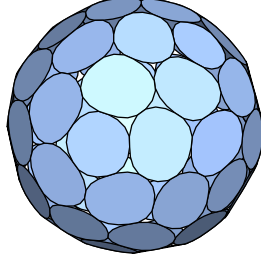

SDP5\_P20\_P21\_5x3-2\_3\_2\_3\_2\_3  
 $\Delta_l = 0.0879, \Delta_a = 0.0879$

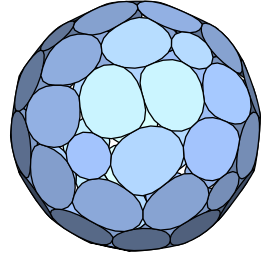

SDP5\_P15\_P22\_5x2-4x3\_2x2  
 $\Delta_l = 0.0879, \Delta_a = 0.0878$

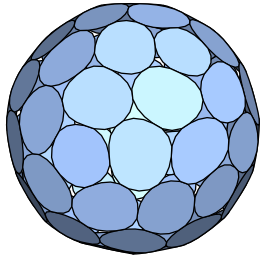

SDP5\_P20\_P21\_5x3-3\_2x2\_3\_2\_3  
 $\Delta_l = 0.0879, \Delta_a = 0.0878$

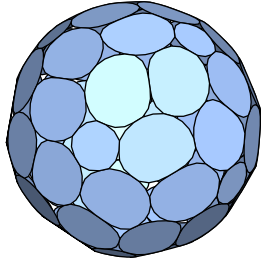

SDP5\_P15\_P22\_5x2-2\_4x3\_2  
 $\Delta_l = 0.0881, \Delta_a = 0.0882$

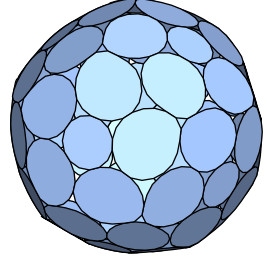

SDP5\_P15\_P19\_5x2-2x2\_3\_2\_1\_3  
 $\Delta_l = 0.0882, \Delta_a = 0.0882$

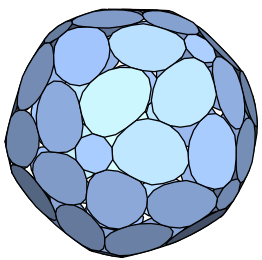

SDP5\_P10\_P19\_5x1-2x2\_1\_2x3\_2  
 $\Delta_l = 0.0883, \Delta_a = 0.0883$

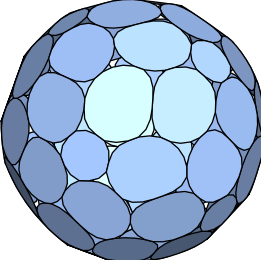

SDP5\_P15\_P22\_5x2-3\_2\_3x3\_2  
 $\Delta_l = 0.0883, \Delta_a = 0.0883$

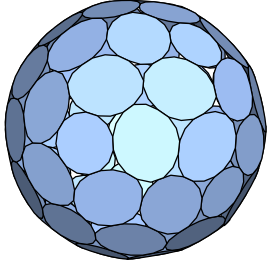

SDP5\_P15\_P17\_5x2-2x2\_1\_3x2  
 $\Delta_l = 0.0884, \Delta_a = 0.0884$

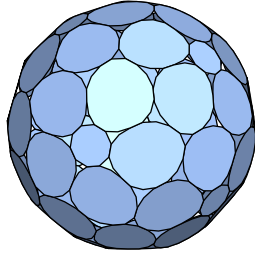

SDP5\_P10\_P17\_5x1-4x2\_1\_2  
 $\Delta_l = 0.0885, \Delta_a = 0.0883$

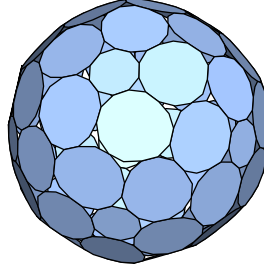

SDP5\_P10\_P14\_5x1-2x1\_2\_2x1\_2  
 $\Delta_l = 0.0885, \Delta_a = 0.0885$

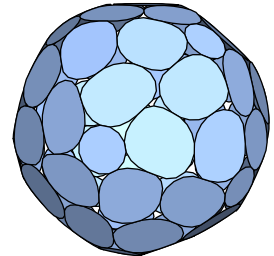

SDP5\_P15\_P22\_5x2-2x3\_1\_3x3  
 $\Delta_l = 0.0885, \Delta_a = 0.0885$

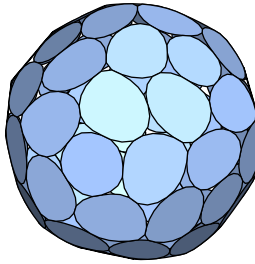

SDP5\_P20\_P21\_5x3-3\_2\_2x3\_1\_3  
 $\Delta_l = 0.0888, \Delta_a = 0.0888$

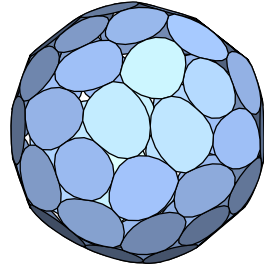

SDP5\_P20\_P21\_5x3-2\_3x3\_1\_3  
 $\Delta_l = 0.0888, \Delta_a = 0.0887$

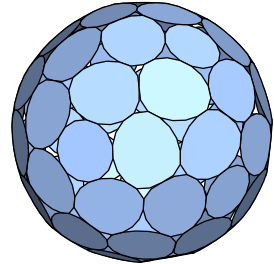

SDP5\_P15\_P17\_5x2-3x2\_1\_3\_1  
 $\Delta_l = 0.0903, \Delta_a = 0.0178$

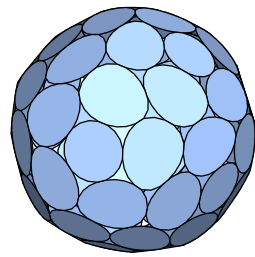

SDP5\_P20\_P21\_5x3-2x3\_2\_3\_2x2  
 $\Delta_l = 0.0906, \Delta_a = 0.0905$

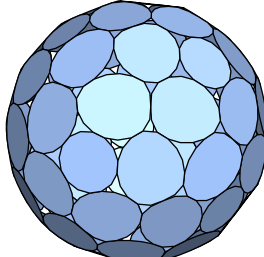

SDP5\_P15\_P17\_5x2-2x2\_1\_2\_3\_1  
 $\Delta_l = 0.0907, \Delta_a = 0.0391$

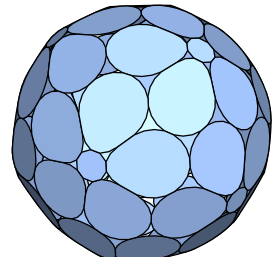

SDP5\_P10\_P24\_5x1-6x3  
 $\Delta_l = 0.0909, \Delta_a = 0.0733$

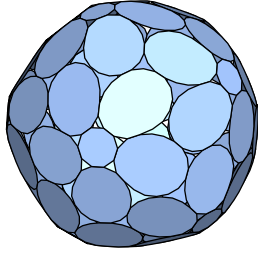

SDP5\_P10\_P18\_5x1-2x1\_2\_3\_2\_3  
 $\Delta_l = 0.0910, \Delta_a = 0.0909$

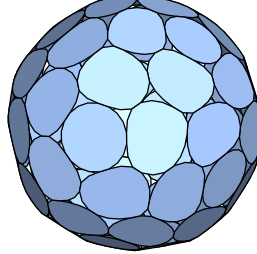

SDP5\_P20\_P19\_5x3-3x2\_3\_1\_3  
 $\Delta_l = 0.0910, \Delta_a = 0.0910$

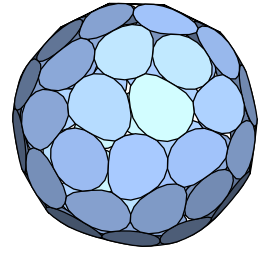

SDP5\_P20\_P19\_5x3-2x2\_3\_3x2  
 $\Delta_l = 0.0914, \Delta_a = 0.0914$

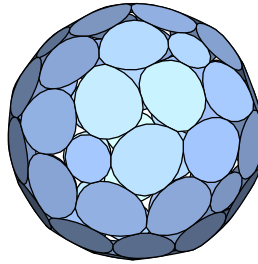

SDP5\_P15\_P22\_5x2-4x3\_1\_3  
 $\Delta_l = 0.0915, \Delta_a = 0.0915$

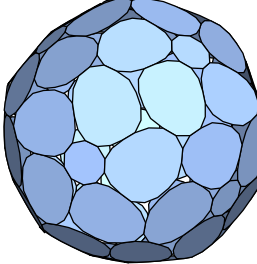

SDP5\_P10\_P17\_5x1-2x2\_3\_2x1\_2  
 $\Delta_l = 0.0917, \Delta_a = 0.0916$

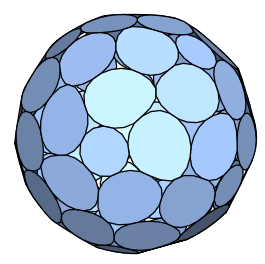

SDP5\_P15\_P20\_5x2-4x2\_2x3  
 $\Delta_l = 0.0918, \Delta_a = 0.0918$

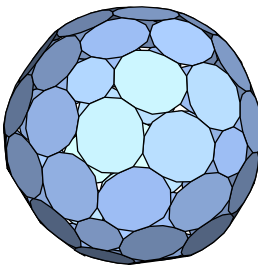

SDP5\_P10\_P14\_5x1-3x1\_2\_1\_2  
 $\Delta_l = 0.0921, \Delta_a = 0.0919$

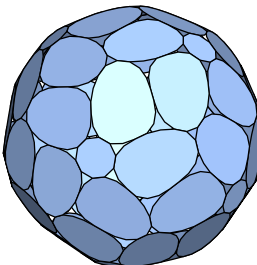

SDP5\_P10\_P19\_5x1-2x2\_2x3\_1\_2  
 $\Delta_l = 0.0923, \Delta_a = 0.0922$

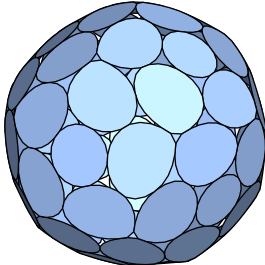

SDP5\_P20\_P22\_5x3-4x3\_1\_3  
 $\Delta_l = 0.0924, \Delta_a = 0.0924$

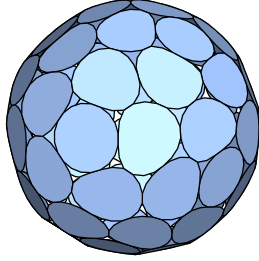

SDP5\_P20\_P19\_5x3-3x2\_3\_2x2  
 $\Delta_l = 0.0924, \Delta_a = 0.0925$

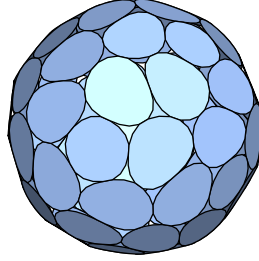

SDP5\_P20\_P21\_5x3-2\_3x3\_2x2  
 $\Delta_l = 0.0926, \Delta_a = 0.0925$

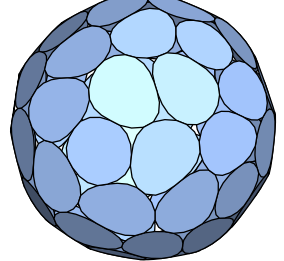

SDP5\_P20\_P21\_5x3-3\_2\_2x3\_2x2  
 $\Delta_l = 0.0926, \Delta_a = 0.0926$

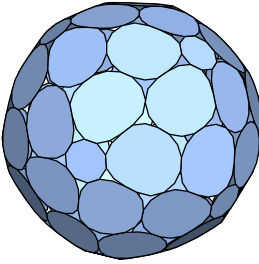

SDP5\_P10\_P17\_5x1-2x2\_1\_3x2  
 $\Delta_l = 0.0927, \Delta_a = 0.0927$

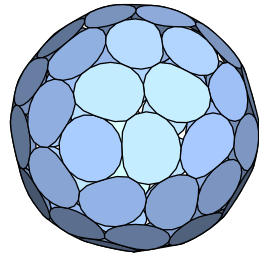

SDP5\_P20\_P19\_5x3-4x2\_3\_2  
 $\Delta_l = 0.0928, \Delta_a = 0.0928$

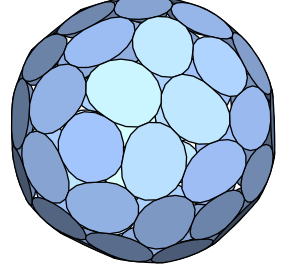

SDP5\_P20\_P20\_5x3-3\_3x2\_3\_2  
 $\Delta_l = 0.0931, \Delta_a = 0.0931$

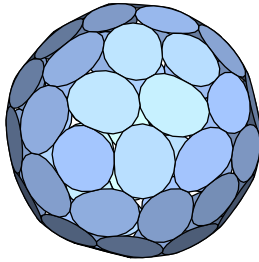

SDP5\_P20\_P20\_5x3-2\_3\_2x2\_3\_2  
 $\Delta_l = 0.0931, \Delta_a = 0.0930$

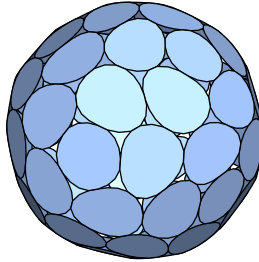

SDP5\_P20\_P20\_5x3-3\_2x2\_3\_2x2  
 $\Delta_l = 0.0932, \Delta_a = 0.0933$

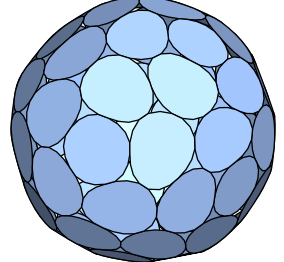

SDP5\_P20\_P20\_5x3-2\_3\_2\_3\_2x2  
 $\Delta_l = 0.0933, \Delta_a = 0.0932$

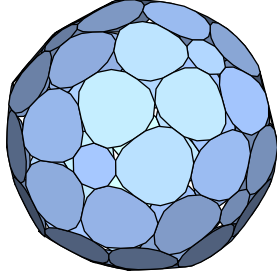

SDP5\_P10\_P17\_5x1-3x2\_1\_2x2  
 $\Delta_l = 0.0934, \Delta_a = 0.0933$

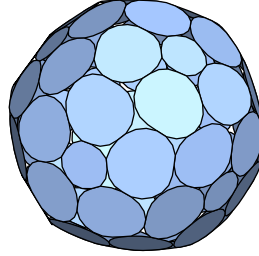

SDP5\_P15\_P21\_5x2-2\_2x3\_2x2\_3  
 $\Delta_l = 0.0936, \Delta_a = 0.0936$

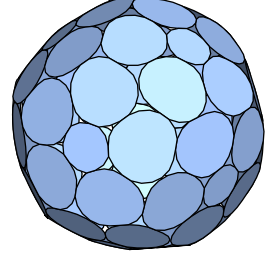

SDP5\_P15\_P21\_5x2-3\_2\_3\_2x2\_3  
 $\Delta_l = 0.0936, \Delta_a = 0.0937$

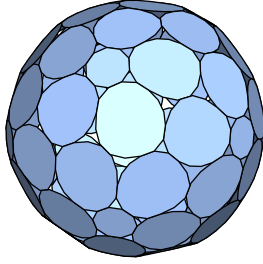

SDP5\_P10\_P16\_5x1-2x1\_2x2\_1\_3  
 $\Delta_l = 0.0938, \Delta_a = 0.0937$

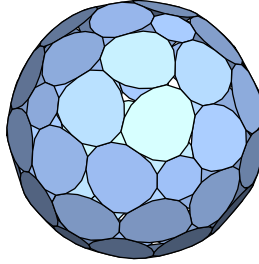

SDP5\_P10\_P16\_5x1-2x2\_2x1\_3\_1  
 $\Delta_l = 0.0938, \Delta_a = 0.0937$

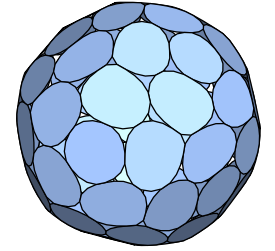

SDP5\_P20\_P20\_5x3-3\_2x2\_3\_1\_3  
 $\Delta_l = 0.0939, \Delta_a = 0.0938$

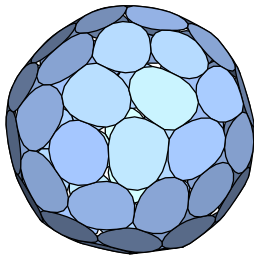

SDP5\_P20\_P20\_5x3-2\_3\_2\_3\_1\_3  
 $\Delta_l = 0.0939, \Delta_a = 0.0939$

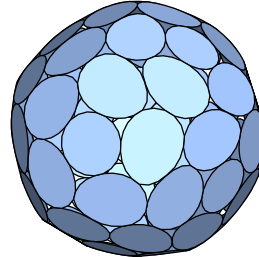

SDP5\_P20\_P21\_5x3-3x3\_3x2  
 $\Delta_l = 0.0940, \Delta_a = 0.0940$

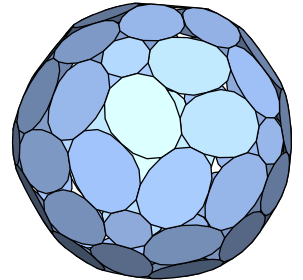

SDP5\_P10\_P16\_5x1-2x1\_2\_3\_1\_2  
 $\Delta_l = 0.0942, \Delta_a = 0.0940$



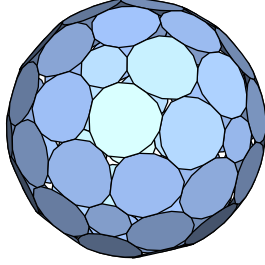

SDP5\_P10\_P15\_5x1-2x1\_2\_1\_2x2  
 $\Delta_l = 0.0942, \Delta_a = 0.0942$

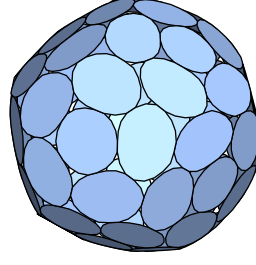

SDP5\_P20\_P20\_5x3-3\_2\_3\_1\_3\_2  
 $\Delta_l = 0.0943, \Delta_a = 0.0941$

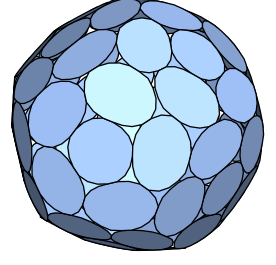

SDP5\_P20\_P20\_5x3-2\_2x3\_1\_3\_2  
 $\Delta_l = 0.0943, \Delta_a = 0.0942$

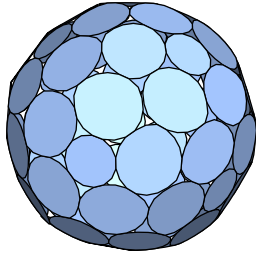

SDP5\_P15\_P19\_5x2-2x2\_3\_1\_3\_2  
 $\Delta_l = 0.0943, \Delta_a = 0.0942$

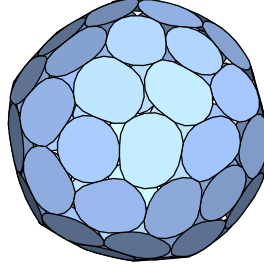

SDP5\_P20\_P20\_5x3-2x2\_3\_2x2\_3  
 $\Delta_l = 0.0944, \Delta_a = 0.0944$

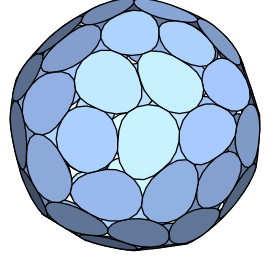

SDP5\_P20\_P20\_5x3-3\_2\_3\_3x2  
 $\Delta_l = 0.0946, \Delta_a = 0.0945$

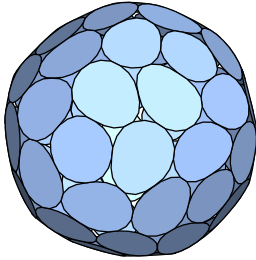

SDP5\_P20\_P20\_5x3-2\_2x3\_3x2  
 $\Delta_l = 0.0947, \Delta_a = 0.0946$

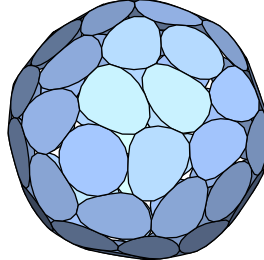

SDP5\_P20\_P18\_5x3-3x2\_3\_1\_2  
 $\Delta_l = 0.0947, \Delta_a = 0.0946$

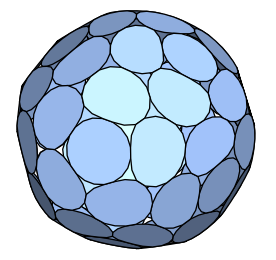

SDP5\_P20\_P18\_5x3-6x2  
 $\Delta_l = 0.0949, \Delta_a = 0.0948$

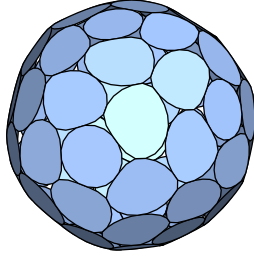

SDP5\_P20\_P20\_5x3-2x2\_2x3\_1\_3  
 $\Delta_l = 0.0951, \Delta_a = 0.0951$

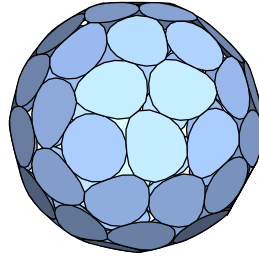

SDP5\_P20\_P19\_5x3-2x2\_1\_2x3\_2  
 $\Delta_l = 0.0951, \Delta_a = 0.0952$

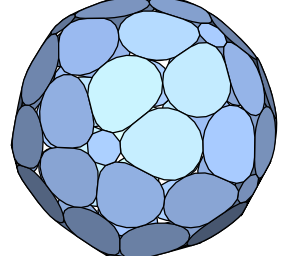

SDP5\_P10\_P23\_5x1-2x3\_2\_3x3  
 $\Delta_l = 0.0952, \Delta_a = 0.0949$

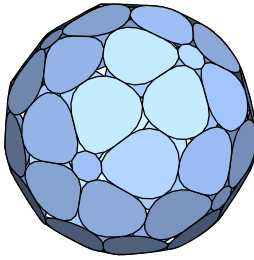

SDP5\_P10\_P23\_5x1-3x3\_2\_2x3  
 $\Delta_l = 0.0952, \Delta_a = 0.0153$

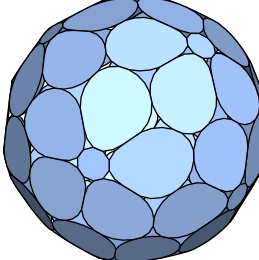

SDP5\_P10\_P23\_5x1-4x3\_2\_3  
 $\Delta_l = 0.0952, \Delta_a = 0.0111$

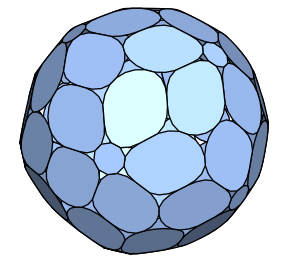

SDP5\_P10\_P23\_5x1-5x3\_2  
 $\Delta_l = 0.0952, \Delta_a = 0.0636$

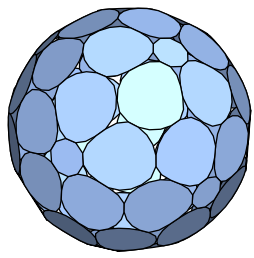

SDP5\_P10\_P19\_5x1-2x2\_3\_1\_3\_2  
 $\Delta_l = 0.0955, \Delta_a = 0.0954$

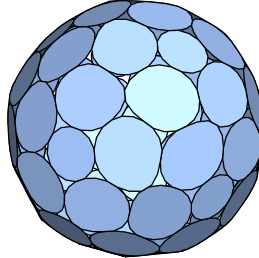

SDP5\_P15\_P19\_5x2-5x2\_3  
 $\Delta_l = 0.0955, \Delta_a = 0.0955$

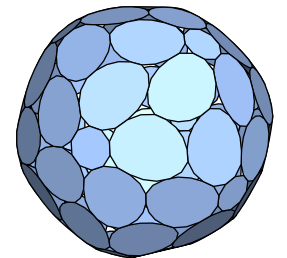

SDP5\_P10\_P17\_5x1-2x1\_2x2\_3\_2  
 $\Delta_l = 0.0955, \Delta_a = 0.0954$

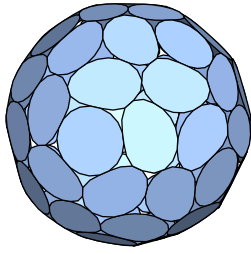

SDP5\_P20\_P18\_5x3-2x2\_1\_2\_3\_2  
 $\Delta_l = 0.0956, \Delta_a = 0.0956$

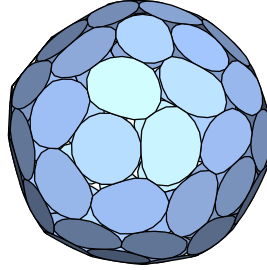

SDP5\_P20\_P19\_5x3-2x2\_3\_1\_3\_2  
 $\Delta_l = 0.0957, \Delta_a = 0.0956$

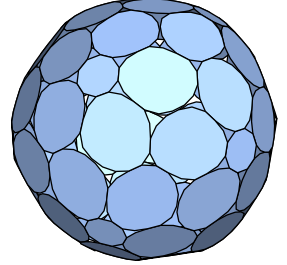

SDP5\_P10\_P17\_5x1-2x2\_1\_3\_1\_2  
 $\Delta_l = 0.0957, \Delta_a = 0.0955$

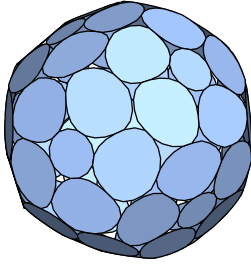

SDP5\_P15\_P21\_5x2-3x3\_1\_3\_2  
 $\Delta_l = 0.0959, \Delta_a = 0.0957$

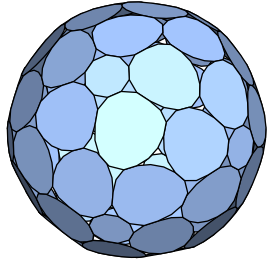

SDP5\_P10\_P16\_5x1-2x1\_2\_1\_3\_2  
 $\Delta_l = 0.0963, \Delta_a = 0.0961$

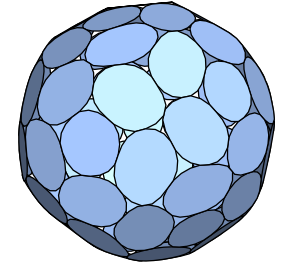

SDP5\_P20\_P21\_5x3-3\_3x2\_2x3  
 $\Delta_l = 0.0964, \Delta_a = 0.0964$

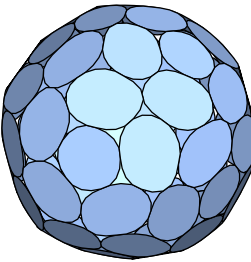

SDP5\_P20\_P21\_5x3-2\_3\_2x2\_2x3  
 $\Delta_l = 0.0965, \Delta_a = 0.0964$

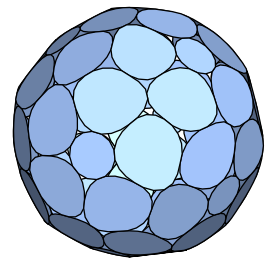

SDP5\_P15\_P22\_5x2-2x3\_2x2\_2x3  
 $\Delta_l = 0.0966, \Delta_a = 0.0966$

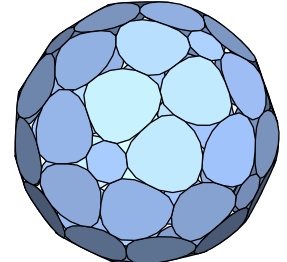

SDP5\_P10\_P18\_5x1-3x2\_1\_3\_2  
 $\Delta_l = 0.0967, \Delta_a = 0.0966$

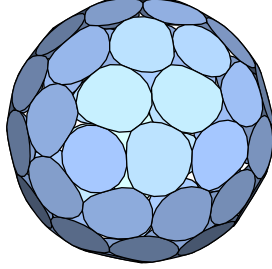

SDP5\_P20\_P20\_5x3-3x2\_3\_2\_3  
 $\Delta_l = 0.0970, \Delta_a = 0.0970$

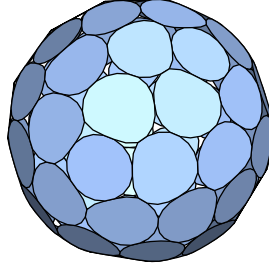

SDP5\_P20\_P20\_5x3-2x2\_3\_2\_3\_2  
 $\Delta_l = 0.0973, \Delta_a = 0.0973$

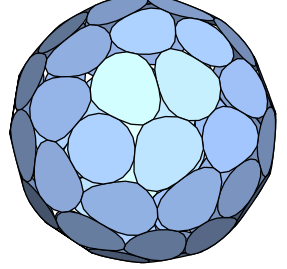

SDP5\_P20\_P20\_5x3-2x2\_2x3\_2x2  
 $\Delta_l = 0.0975, \Delta_a = 0.0973$

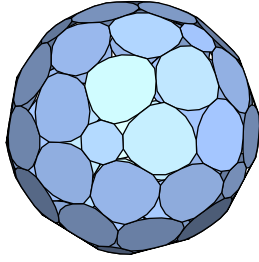

SDP5\_P10\_P17\_5x1-3x2\_1\_3\_1  
 $\Delta_l = 0.0976, \Delta_a = 0.0728$

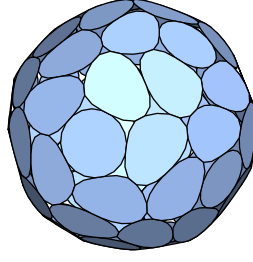

SDP5\_P20\_P19\_5x3-2x2\_2x3\_1\_2  
 $\Delta_l = 0.0979, \Delta_a = 0.0979$

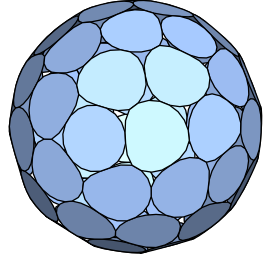

SDP5\_P20\_P20\_5x3-3x2\_2x3\_2  
 $\Delta_l = 0.0983, \Delta_a = 0.0983$

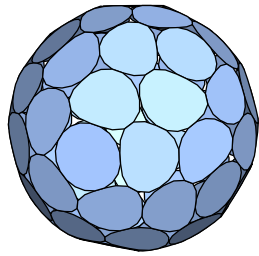

SDP5\_P20\_P18\_5x3-2x2\_1\_3\_2x2  
 $\Delta_l = 0.0985, \Delta_a = 0.0985$

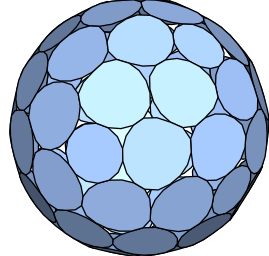

SDP5\_P15\_P17\_5x2-2x2\_1\_3\_1\_2  
 $\Delta_l = 0.0989, \Delta_a = 0.0988$

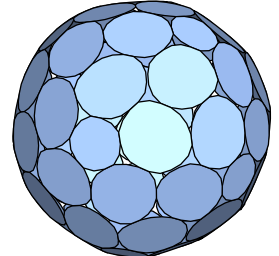

SDP5\_P15\_P20\_5x2-2\_3\_1\_2x3\_2  
 $\Delta_l = 0.0989, \Delta_a = 0.0988$

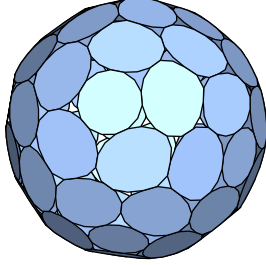

SDP5\_P15\_P16\_5x2-2x2\_1\_2\_1\_2  
 $\Delta_l = 0.0989$ ,  $\Delta_a = 0.0988$

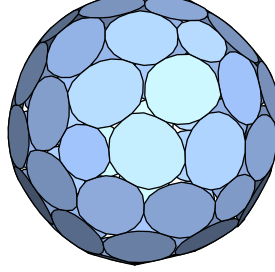

SDP5\_P15\_P20\_5x2-3\_2\_1\_2x3\_2  
 $\Delta_l = 0.0989$ ,  $\Delta_a = 0.0988$

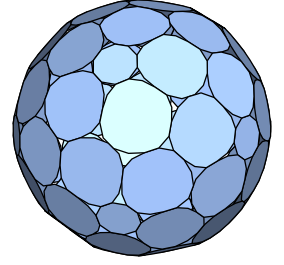

SDP5\_P10\_P16\_5x1-2x2\_1\_2\_1\_2  
 $\Delta_l = 0.0990$ ,  $\Delta_a = 0.0989$

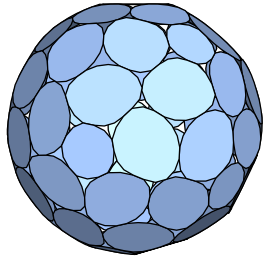

SDP5\_P15\_P19\_5x2-2\_3\_1\_2\_3\_2  
 $\Delta_l = 0.0993$ ,  $\Delta_a = 0.0992$

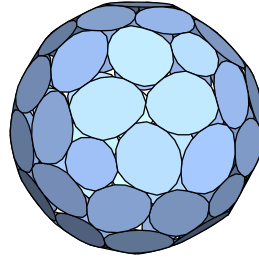

SDP5\_P15\_P19\_5x2-3\_2\_1\_2\_3\_2  
 $\Delta_l = 0.0993$ ,  $\Delta_a = 0.0993$

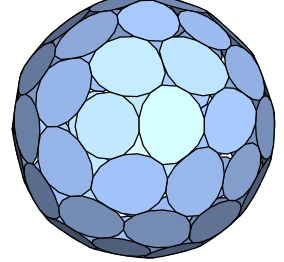

SDP5\_P15\_P16\_5x2-2x2\_1\_2x2\_1  
 $\Delta_l = 0.0993$ ,  $\Delta_a = 0.0993$

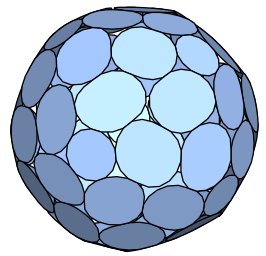

SDP5\_P15\_P19\_5x2-2x2\_1\_3\_2\_3  
 $\Delta_l = 0.0994$ ,  $\Delta_a = 0.0974$

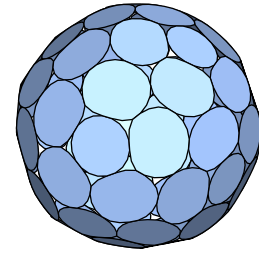

SDP5\_P20\_P21\_5x3-2x2\_3\_2\_2x3  
 $\Delta_l = 0.0997$ ,  $\Delta_a = 0.0996$

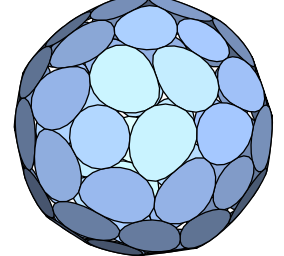

SDP5\_P20\_P22\_5x3-4x3\_2x2  
 $\Delta_l = 0.0998$ ,  $\Delta_a = 0.0997$

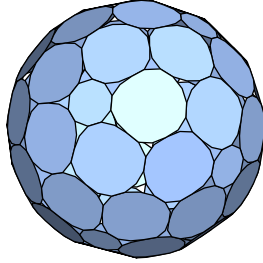

SDP5\_P10\_P16\_5x1-3x2\_1\_2\_1  
 $\Delta_l = 0.0998, \Delta_a = 0.0996$

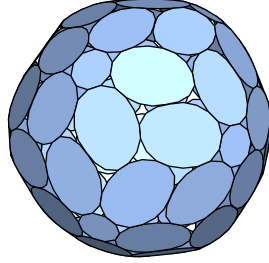

SDP5\_P10\_P17\_5x1-2x1\_2\_3\_2x2  
 $\Delta_l = 0.0999, \Delta_a = 0.0998$

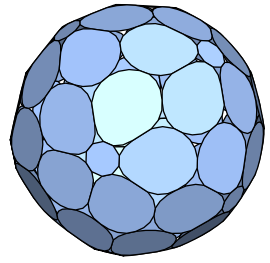

SDP5\_P10\_P22\_5x1-2x3\_2\_2x3\_2  
 $\Delta_l = 0.0999, \Delta_a = 0.0999$

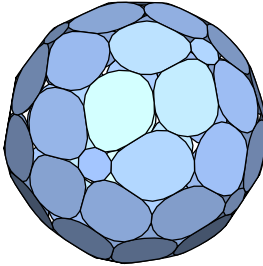

SDP5\_P10\_P22\_5x1-3x3\_2\_3\_2  
 $\Delta_l = 0.0999, \Delta_a = 0.0002$

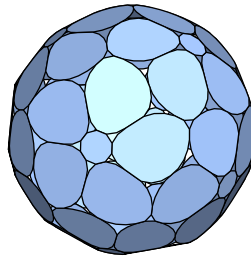

SDP5\_P10\_P22\_5x1-4x3\_1\_3  
 $\Delta_l = 0.0999, \Delta_a = 0.0152$

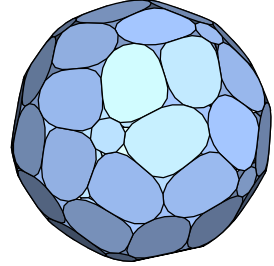

SDP5\_P10\_P22\_5x1-4x3\_2x2  
 $\Delta_l = 0.0999, \Delta_a = 0.0105$

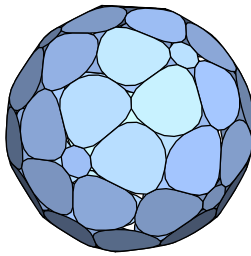

SDP5\_P10\_P22\_5x1-2x3\_2x2\_2x3  
 $\Delta_l = 0.0999, \Delta_a = 0.0897$

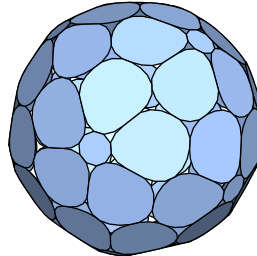

SDP5\_P10\_P22\_5x1-2x3\_2\_3\_2\_3  
 $\Delta_l = 0.0999, \Delta_a = 0.0134$

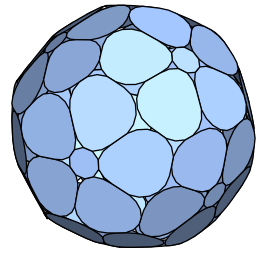

SDP5\_P10\_P22\_5x1-3x3\_2x2\_3  
 $\Delta_l = 0.0999, \Delta_a = 0.0115$

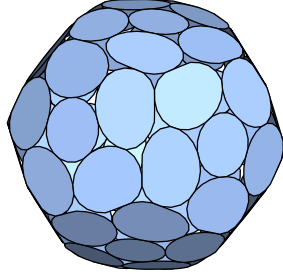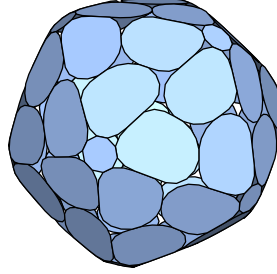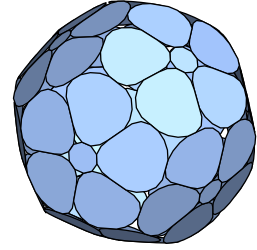

SDP5\_P20\_P22\_5x3-3x3\_2x2\_3  
 $\Delta_l = 0.0999, \Delta_a = 0.0190$

SDP5\_P10\_P22\_5x1-2x3\_1\_3x3  
 $\Delta_l = 0.1, \Delta_a = 0.0502$

SDP5\_P10\_P22\_5x1-3x3\_1\_2x3  
 $\Delta_l = 0.1, \Delta_a = 0.0957$
